# Supplementary material for: X-ray-activated persistent luminescence nanomaterials for NIR-II imaging
Source: Springer Nature journal article supplement (doi:10.1038/s41565-021-00922-3), 2021-06-10
Supplement: 41565_2021_922_MOESM1_ESM.pdf [file 41565_2021_922_MOESM1_ESM.pdf]

---

**Supplementary information**

---

**X-ray-activated persistent luminescence  
nanomaterials for NIR-II imaging**

---

In the format provided by the  
authors and unedited

## Supplementary Information for

### **X-ray-activated persistent luminescence nanomaterials for NIR-II imaging**

Peng Pei<sup>1</sup>, Ying Chen<sup>1</sup>, Caixia Sun<sup>1</sup>, Yong Fan<sup>1\*</sup>, Yanmin Yang<sup>2\*</sup>, Xuan Liu<sup>1</sup>, Lingfei Lu<sup>1</sup>, Mengyao Zhao<sup>1</sup>, Hongxin Zhang<sup>1</sup>, Dongyuan Zhao<sup>1</sup>, Xiaogang Liu<sup>3,4</sup>, and Fan Zhang<sup>1\*</sup>

<sup>1</sup>Department of Chemistry, State Key Laboratory of Molecular Engineering of Polymers and iChem, Shanghai Key Laboratory of Molecular Catalysis and Innovative Materials, Fudan University, Shanghai 200433, China.

<sup>2</sup>College of Physics Science and Technology, Hebei University, Baoding 071002, China.

<sup>3</sup>Department of Chemistry, National University of Singapore, Singapore, Singapore.

<sup>4</sup>Joint School of National University of Singapore and Tianjin University, International Campus of Tianjin University, Fuzhou 350207, China

\*Corresponding author: [fan\\_yong@fudan.edu.cn](mailto:fan_yong@fudan.edu.cn); [mihuyym@163.com](mailto:mihuyym@163.com); [zhang\\_fan@fudan.edu.cn](mailto:zhang_fan@fudan.edu.cn)

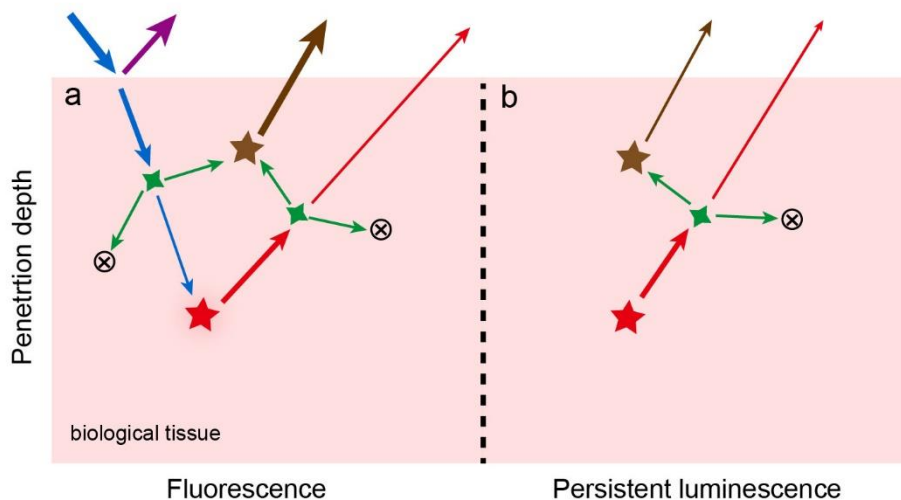

**Figure S1 | Comparative FL and PL imaging in biological tissue. a,** Light-tissue interactions in fluorescence (FL) imaging from impinging excitation light (blue). Interface reflection (purple), scattering (green), absorption (black circle with cross), and autofluorescence (brown) all contribute to the loss of signal (red) and the gain of noise. **b,** Light-tissue interaction in persistent luminescence (PL) imaging. Upon stoppage of the excitation, no autofluorescence is produced from the excitation light, and background is generated only by spontaneous substrate emission (brown). As a result, PL imaging achieved much higher signal-to-background ratios in deep tissue than FL imaging.

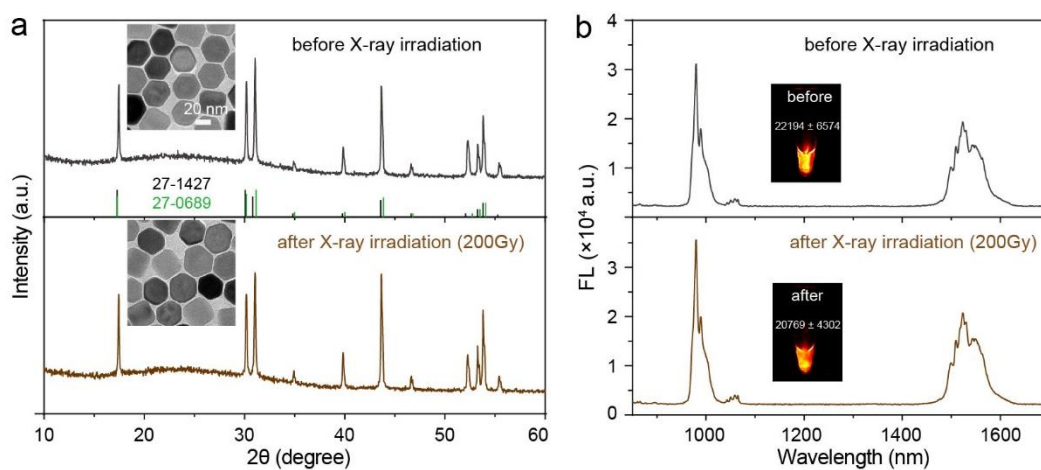

**Figure S2 | Stability of Ln-PLNPs against X-ray.** **a**, XRD patterns of Er-PLNPs ( $\text{NaYF}_4:3\%\text{Er}@ \text{NaYF}_4$ ) before and after X-ray irradiation ( $\sim 200$  Gy) and inserts show the corresponding TEM images. The standard diffraction patterns of hexagonal  $\text{NaErF}_4$  (JCPDS 27-0689) and hexagonal  $\text{NaYF}_4$  (JCPDS 27-1427) are included for reference. **b**, FL emission spectra of Er-PLNPs ( $\text{NaYF}_4:3\%\text{Er}@ \text{NaYF}_4$ ) before and after X-ray irradiation ( $\sim 200$  Gy) and inserts show FL images of the Er-PLNPs filled centrifuge tube, excited by 808 nm laser. These results show negligible effects of X-ray irradiation on the crystal phase and optical properties of Ln-PLNPs.

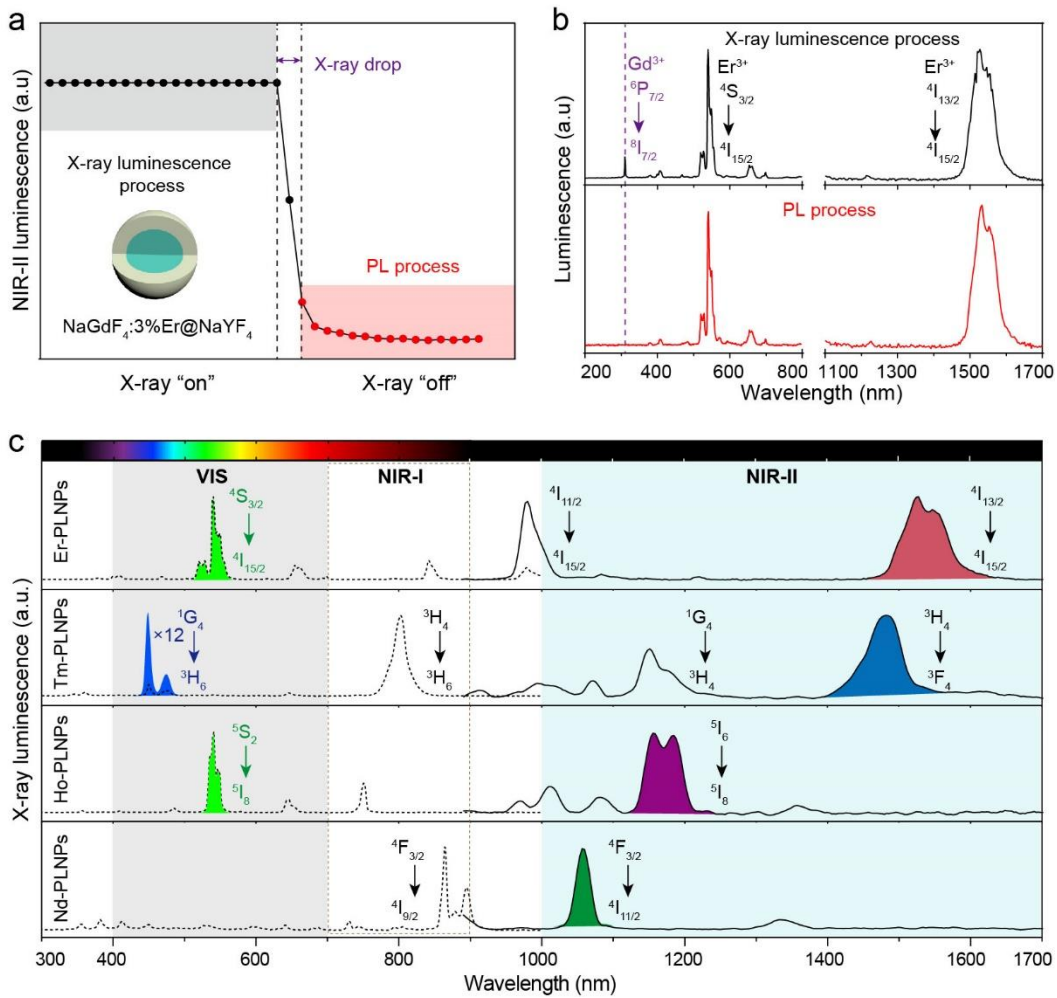

**Figure S3 | Correlation between X-ray luminescence and persistent luminescence of Ln-PLNPs.**

**a**, NIR-II luminescence of NaGdF<sub>4</sub>:3%Er@NaYF<sub>4</sub>, recorded upon X-ray excitation and stoppage over time. **b**, Corresponding luminescence spectra of X-ray luminescence and PL. During the PL process in **a**, excitons released from traps can transfer energy to activators (Nd<sup>3+</sup>, Ho<sup>3+</sup>, Tm<sup>3+</sup> or Er<sup>3+</sup>), generating PL with identical emission patterns to their X-ray luminescence. However, the lowest excited levels of Gd<sup>3+</sup> in NaGdF<sub>4</sub>:3%Er@NaYF<sub>4</sub> are exceedingly high to allow this transfer<sup>1,2</sup>, resulting in no detectable Gd<sup>3+</sup> emission at 310 nm (<sup>6</sup>P<sub>7/2</sub> → <sup>8</sup>S<sub>7/2</sub>). **c**, Normalized X-ray luminescence spectra of Er-PLNPs (NaYF<sub>4</sub>:3%Er@NaYF<sub>4</sub>), Tm-PLNPs (NaYF<sub>4</sub>:1%Tm@NaYF<sub>4</sub>), Ho-PLNPs (NaYF<sub>4</sub>:1%Ho@NaYF<sub>4</sub>), Nd-PLNPs (NaYF<sub>4</sub>:1%Er@NaYF<sub>4</sub>) in the full visible-near-infrared region. The dose rate of X-rays is 20 Gy/min, and all samples were dispersed in cyclohexane (0.2 mM).

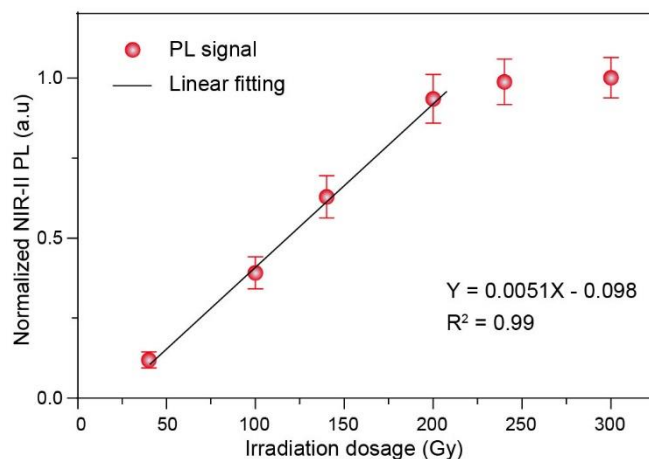

**Figure S4 | Optical responses of Ln-PLNPs.** Correlation between the PL signal and irradiation dosage of X-rays, showing a linear dependence at an irradiation dosage of < 200 Gy. When further increasing the dosage (> 200 Gy), a plateau of the NIR-II PL intensity was found due to the limitation in harvesting energy by the nanoparticles ( $n = 3$  independent experiments.). In this work, we chose the saturation dosage of X-rays (200 Gy) for all PL imaging experiments. PL signals were extracted from an Er-PLNP ( $\text{NaYF}_4:3\%\text{Er}@\text{NaYF}_4$ , 0.2 mM in cyclohexane) filled centrifuge tube, acquired using a home-made NIR-II imaging system with 5 s exposure time. The data are shown as the mean  $\pm$  SD.

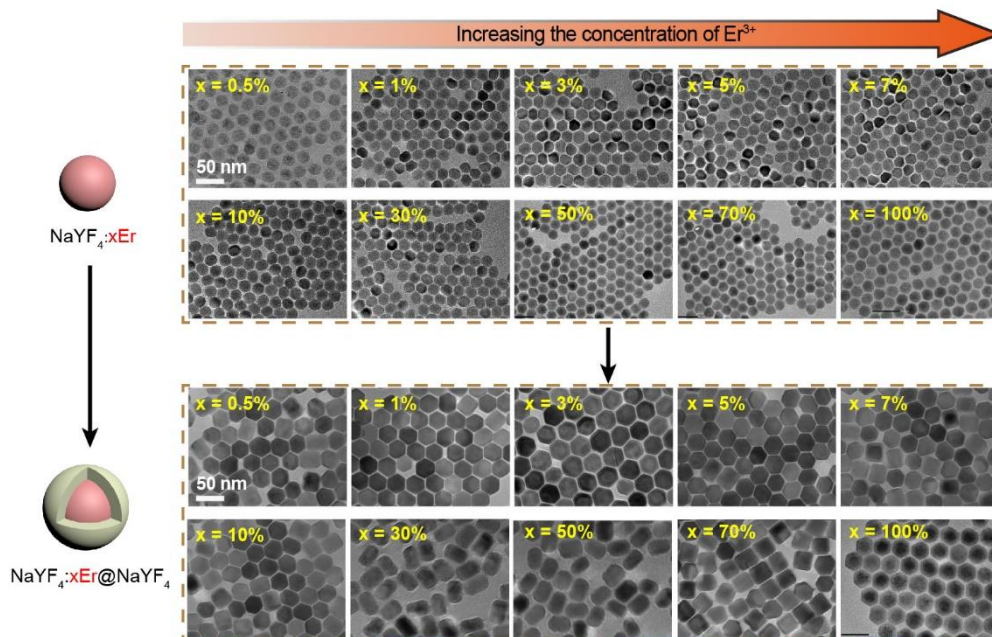

**Figure S5 | TEM images of core-shell Er-PLNPs ( $\text{NaYF}_4:\text{xEr}@\text{NaYF}_4$ ) with varying concentration of  $\text{Er}^{3+}$  in the inner core.** Core-shell nanoparticle synthesis involves the growth of core particles ( $\sim 22$  nm) as the seed, followed by the successive deposition of an epitaxial shell of  $\text{NaYF}_4$ .

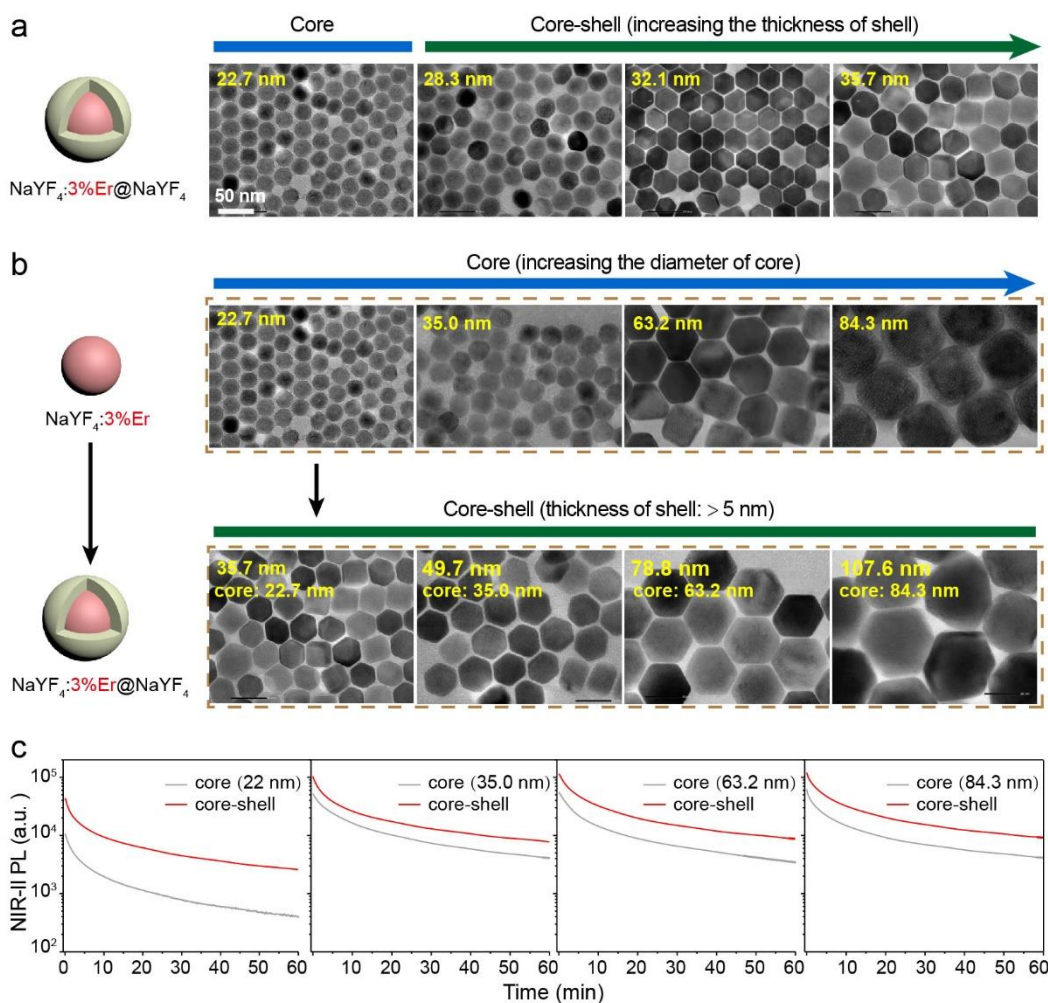

**Figure S6 | Characterization of core-shell Er-PLNPs ( $\text{NaYF}_4:3\% \text{Er} @ \text{NaYF}_4$ ).** **a**, TEM images of Er-PLNPs with varying shell thickness. **b**, TEM images of Er-PLNPs with varying core sizes while keeping the shell thickness similar (7~10 nm). **c**, Corresponding NIR-II PL decay curves of Er-PLNPs with varied core sizes. All samples (0.2 mM in cyclohexane) were pre-irradiated by X-ray (200 Gy) and then imaged with 5 s exposure time.



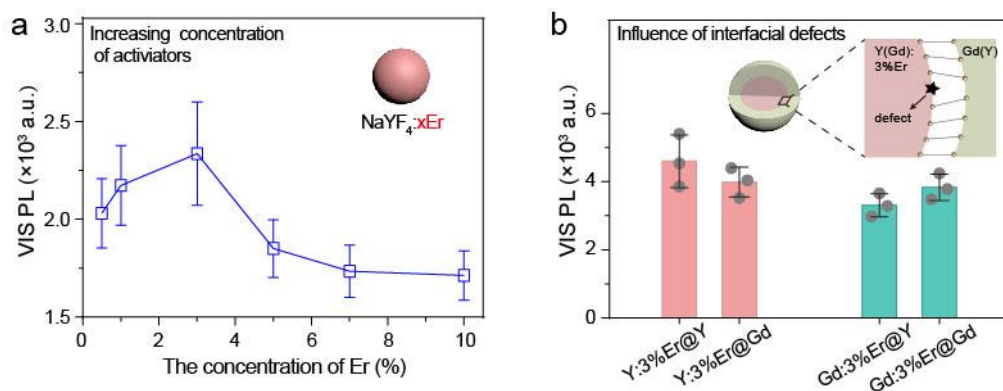

**Figure S7 | Persistent luminescence of core-shell Er-PLNPs in the visible region. a, b,** Influence of activator concentrations (**a**) and host materials (**b**) on PL intensity of Er-PLNPs emitting at 540 nm ( $n = 3$  independent experiments). All samples (0.2 mM in cyclohexane) were pre-irradiated by X-ray (200 Gy) and then imaged using a SCMOS camera with 1 s exposure time. The data are shown as the mean  $\pm$  SD.

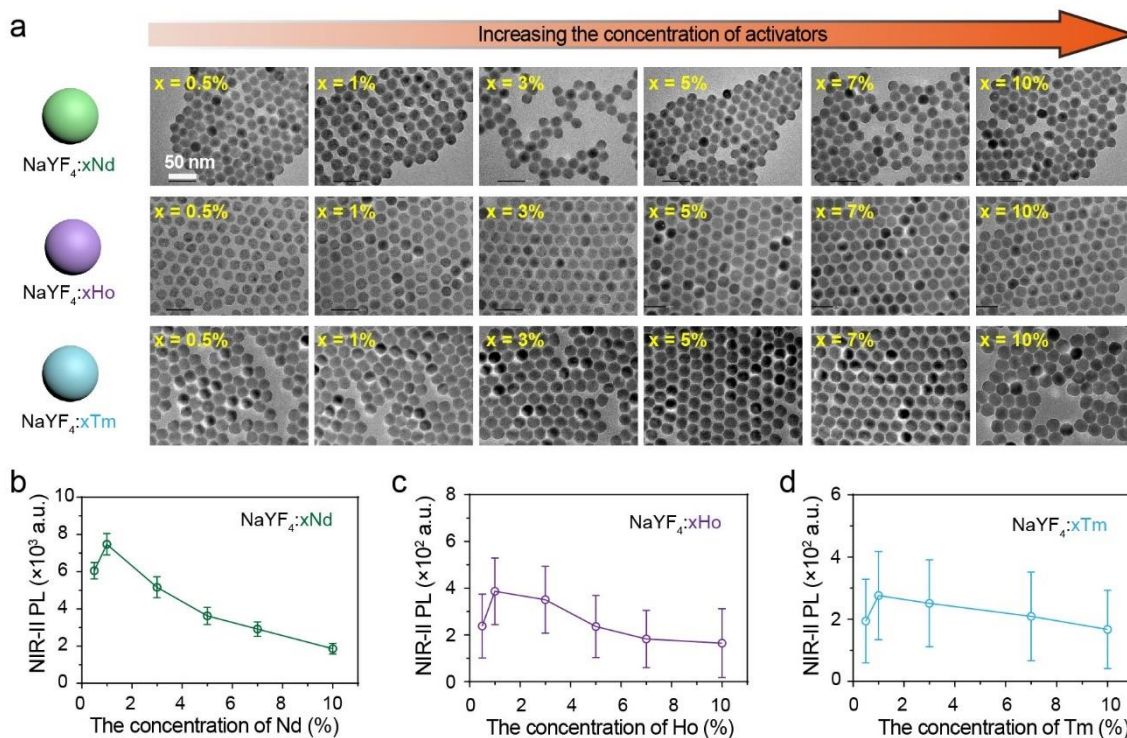

**Figure S8 | Optimization of dopant concentration in Ln-PLNPs for efficient NIR-II persistent luminescence.** **a**, TEM images of hexagonal NaYF<sub>4</sub>:xNd, NaYF<sub>4</sub>:xHo and NaYF<sub>4</sub>:xTm comprising varying concentration of Nd<sup>3+</sup>, Ho<sup>3+</sup> and Tm<sup>3+</sup>, respectively. **b**, **c**, **d**, Corresponding NIR-II PL intensity as a function of Nd<sup>3+</sup> (**b**), Ho<sup>3+</sup> (**c**), and Tm<sup>3+</sup> (**d**) concentrations ( $n = 3$  independent experiments). Based on the results, the optimal concentrations for Nd<sup>3+</sup>, Ho<sup>3+</sup>, and Tm<sup>3+</sup> are all set as 1%. All samples (0.2 mM in cyclohexane) were pre-irradiated by X-ray (200 Gy) and then imaged with 5 s exposure time. The data are shown as the mean  $\pm$  SD.

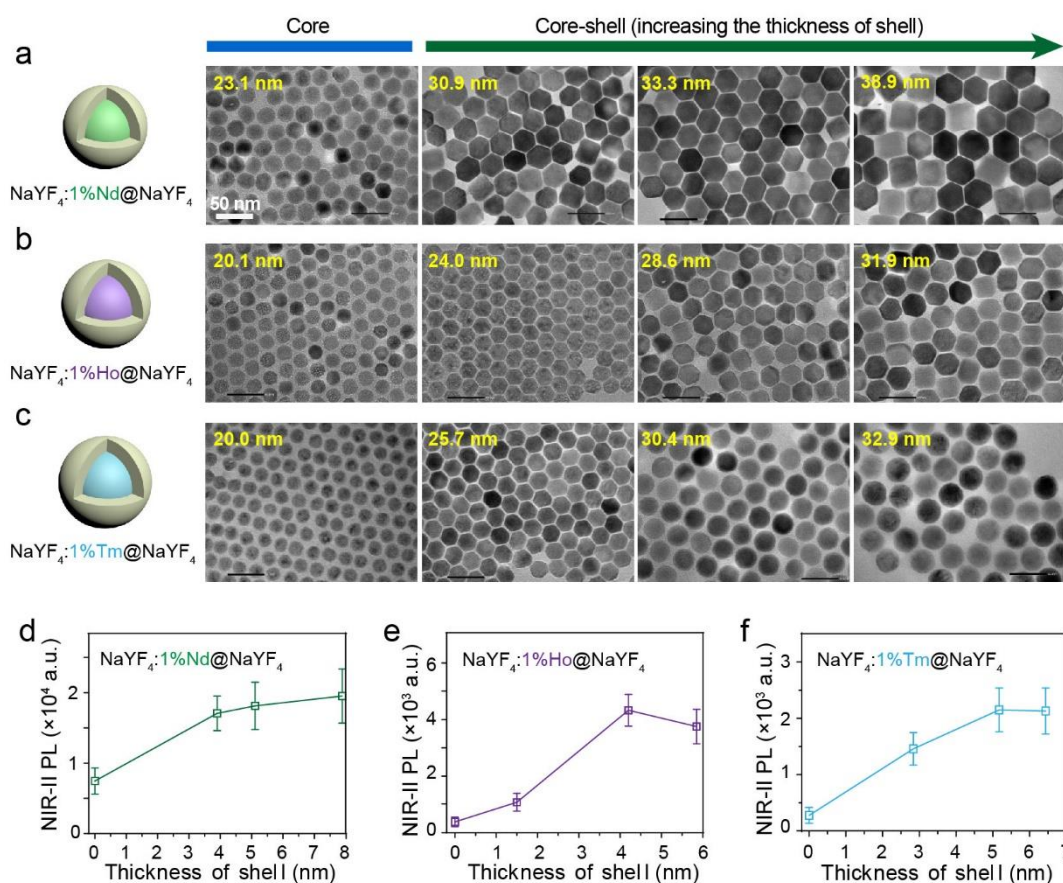

**Figure S9 | Optimization of the shell thickness in Nd-PLNPs, Ho-PLNPs, and Tm-PLNPs for efficient NIR-II persistent luminescence.** **a,b,c**, TEM images of Nd-PLNPs (NaYF<sub>4</sub>:1%Nd@NaYF<sub>4</sub>) (a), Ho-PLNPs (NaYF<sub>4</sub>:1%Ho@NaYF<sub>4</sub>) (b) and Tm-PLNPs (NaYF<sub>4</sub>:1%Tm@NaYF<sub>4</sub>) (c) with varied shell thicknesses. **d,e,f**, Corresponding NIR-II PL intensities of Nd-PLNPs (d), Ho-PLNPs (e) and Tm-PLNPs (f) as a function of shell thickness ( $n = 3$  independent experiments). All samples (0.2 mM in cyclohexane) were pre-irradiated by X-ray (200 Gy) and then imaged with 5 s exposure time. The data are shown as the mean  $\pm$  SD.

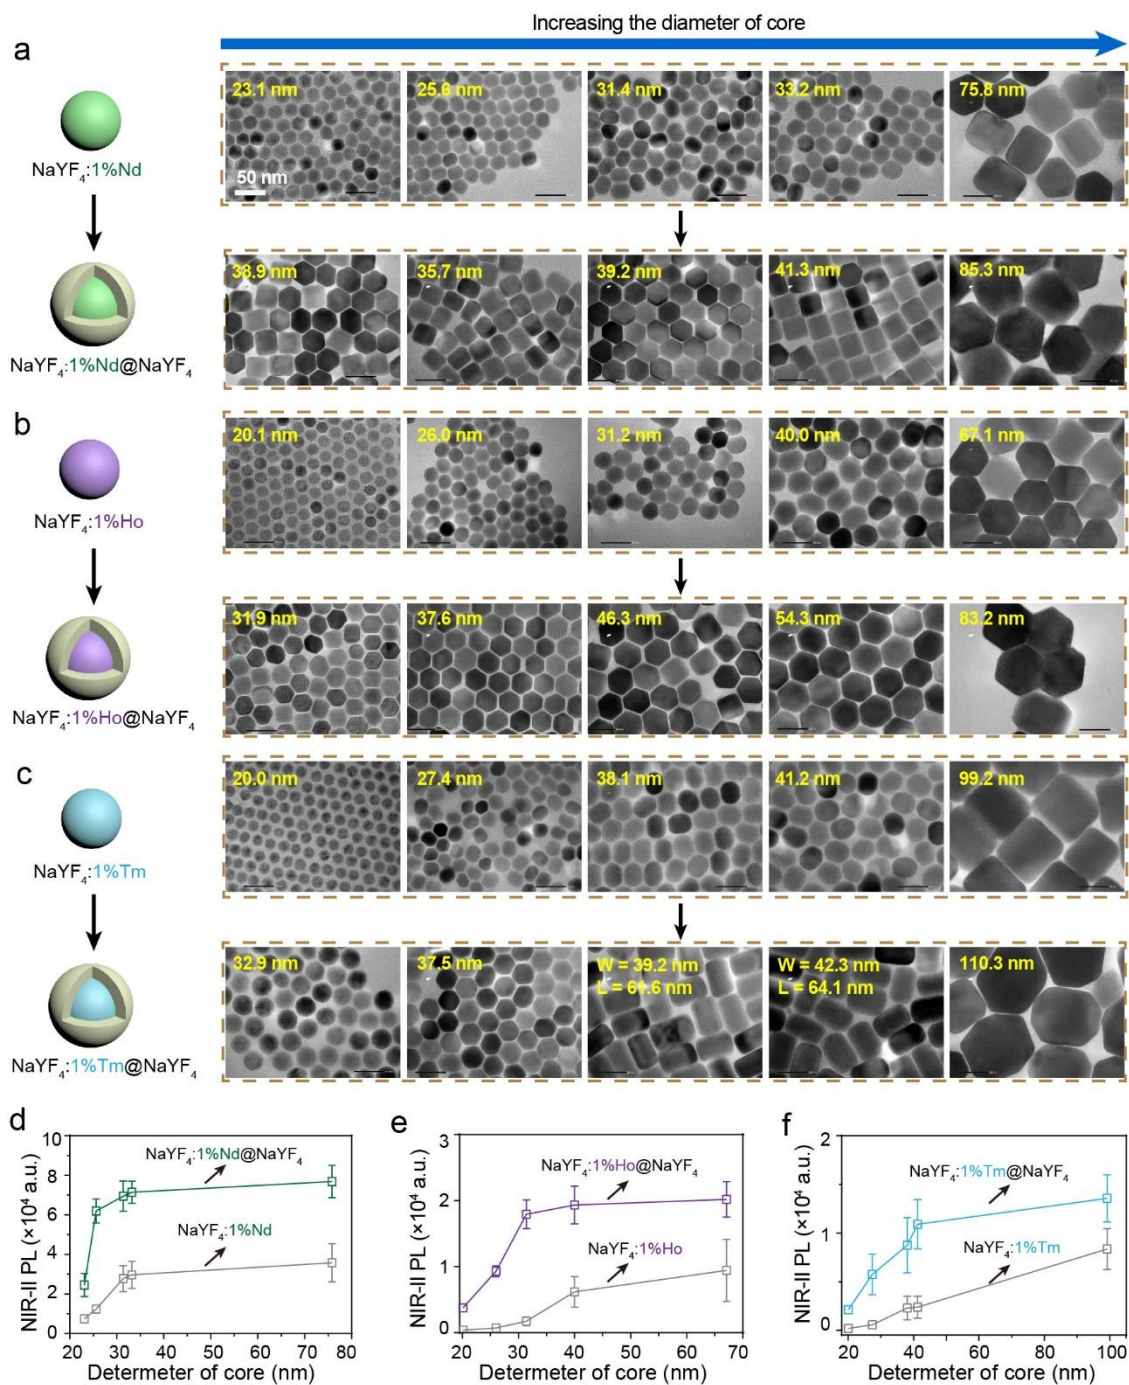

**Figure S10 | Optimization of the core size in Nd-PLNPs, Ho-PLNPs and Tm-PLNPs for efficient NIR-II persistent luminescence.** a,b,c, TEM images of core-shell Nd-PLNPs ( $\text{NaYF}_4:1\% \text{Nd} @ \text{NaYF}_4$ ) (a), Ho-PLNPs ( $\text{NaYF}_4:1\% \text{Ho} @ \text{NaYF}_4$ ) (b) and Tm-PLNPs ( $\text{NaYF}_4:1\% \text{Tm} @ \text{NaYF}_4$ ) (c) with varied core sizes. The shell thicknesses were kept above 5 nm for all samples. d,e,f, Corresponding NIR-II PL intensities of Nd-PLNPs (d), Ho-PLNPs (e) and Tm-PLNPs (f) as a function of core size ( $n = 3$  independent experiments) All samples (0.2 mM in

cyclohexane) were pre-irradiated by X-ray (200 Gy) and then imaged with 5 s exposure time. The data are shown as the mean  $\pm$  SD.

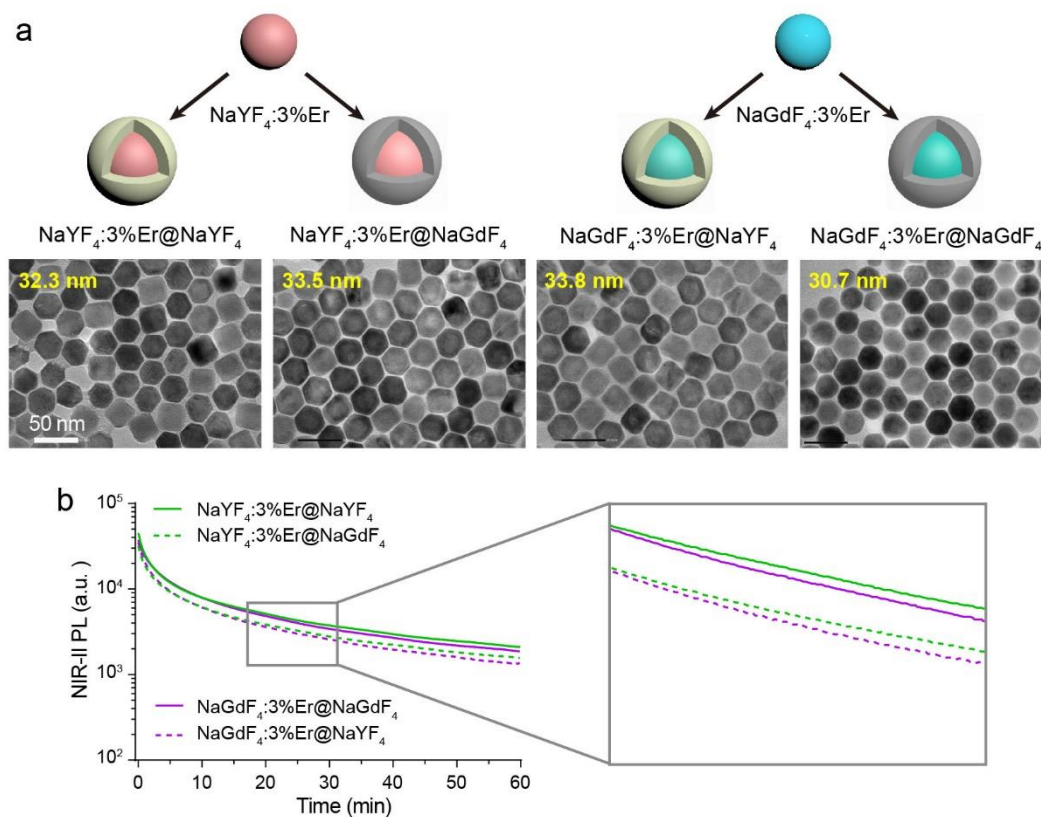

**Figure S11 | Characterization of the core-shell interface on NIR-II persistent luminescence of Er-PLNPs. a,b,** TEM images (a) and the corresponding NIR-II PL decay curves (b) of core-shell NaYF<sub>4</sub>:3%Er@NaYF<sub>4</sub>, NaYF<sub>4</sub>:3%Er@NaGdF<sub>4</sub>, NaGdF<sub>4</sub>:3%Er@NaYF<sub>4</sub> and NaGdF<sub>4</sub>:3%Er@NaGdF<sub>4</sub> nanoparticles, respectively. The results show that, due to reduced core-shell interfacial defects, the NIR-II PL intensities of the core-shell Er-PLNPs with the same host matrix in the core and shell were higher than the ones with different host matrix over time. All samples (0.2 mM in cyclohexane) were pre-irradiated by X-ray (200 Gy) and then imaged with 5 s exposure time.

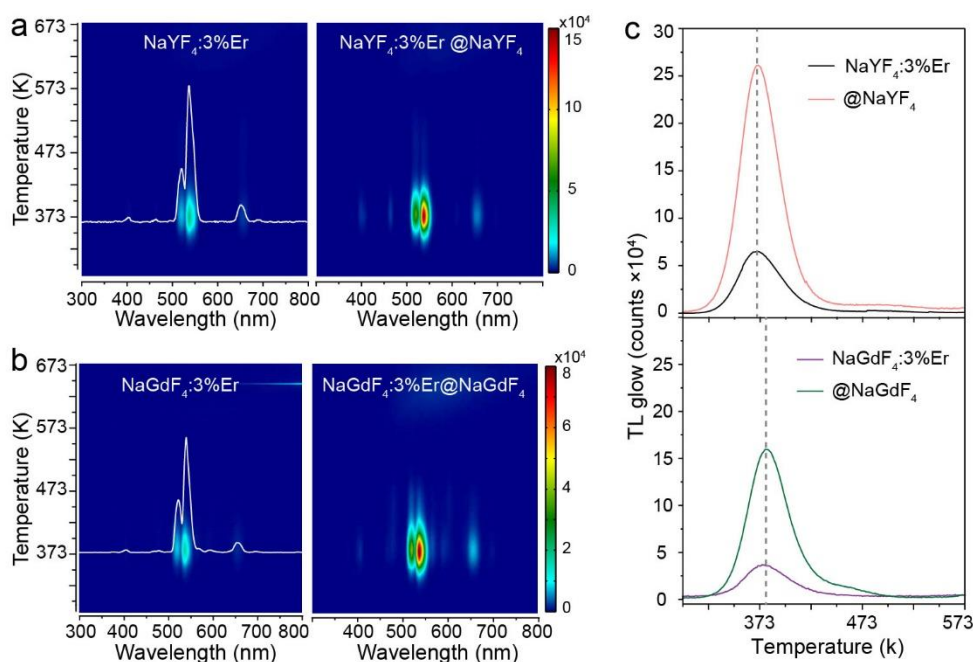

**Figure S12 | Comparative thermoluminescence of Er-PLNPs with different host materials in the core and shell. a,b,** Contour maps of the TL intensity versus emission wavelength and temperature for NaYF<sub>4</sub>:3%Er@NaYF<sub>4</sub> (a) and NaGdF<sub>4</sub>:3%Er@NaGdF<sub>4</sub> (b) nanoparticles. **c,** Corresponding TL glow curves derived from the integral emission intensity of the nanoparticles from the contour maps in a and b. It should be noted that an inert shell shows no influence on the depth of energy traps, as demonstrated by comparing position of TL glow peaks of core and core-shell Ln-PLNPs. However, the higher integrated intensity of TL glow curves of NaYF<sub>4</sub>:3%Er@NaYF<sub>4</sub> nanoparticles indicates that core-shell particles can store and release more energy compared to bare core particles.

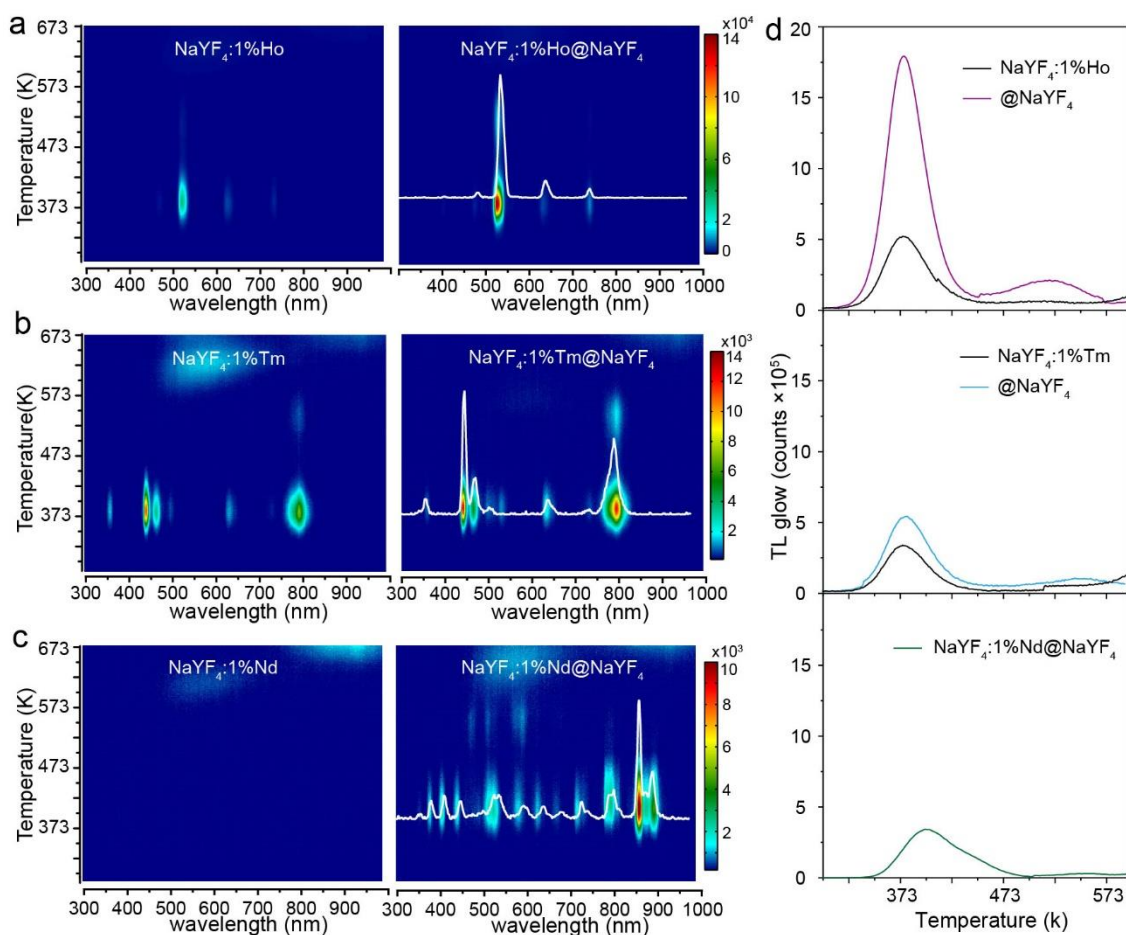

**Figure S13 | Comparative thermoluminescence of Ho-PLNPs, Tm-PLNPs and Nd-PLNPs with bare core and core-shell structures. a,b,c,** Contour mappings of the TL intensity as a function of emission wavelength and temperature for hexagonal Ho-PLNPs ( $\text{NaYF}_4:1\%\text{Ho}@NaYF_4$ ) (**a**), Tm-PLNPs ( $\text{NaYF}_4:1\%\text{Tm}@NaYF_4$ ) (**b**) and Nd-PLNPs ( $\text{NaYF}_4:1\%\text{Nd}@NaYF_4$ ) (**c**). **d,** Corresponding TL glow curves deriving from the integral emission intensity of the nanoparticles from the contour maps in **a-c**.

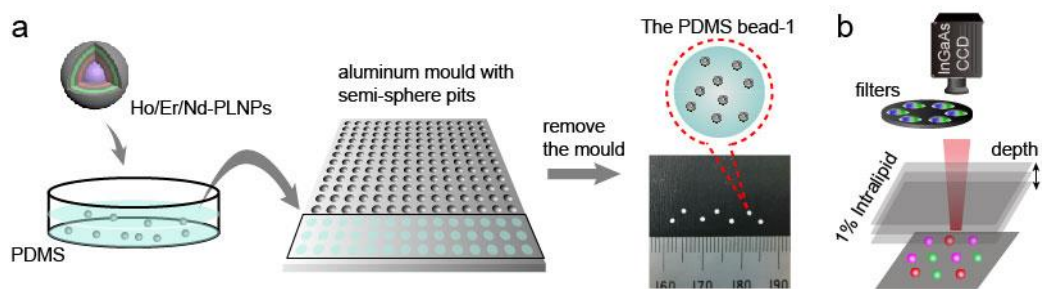

**Figure S14 | Persistent luminescence coding with PDMS beads encapsulating different types of multilayered PLNPs. a,** Fabrication procedure for the encoded beads (bead-1 as an example). **b,** Scheme of imaging set-up for PDMS bead decoding. All beads were mixed and placed randomly in a Petri dish covered with 2-mm mimic tissue (1% Intralipid). After pre-irradiated with X-ray (200 Gy), the NIR-II PL signals of beads in Er-channel, Nd-channel and Ho-channel were acquired using the home-made NIR-II imaging system with 10 s exposure time.



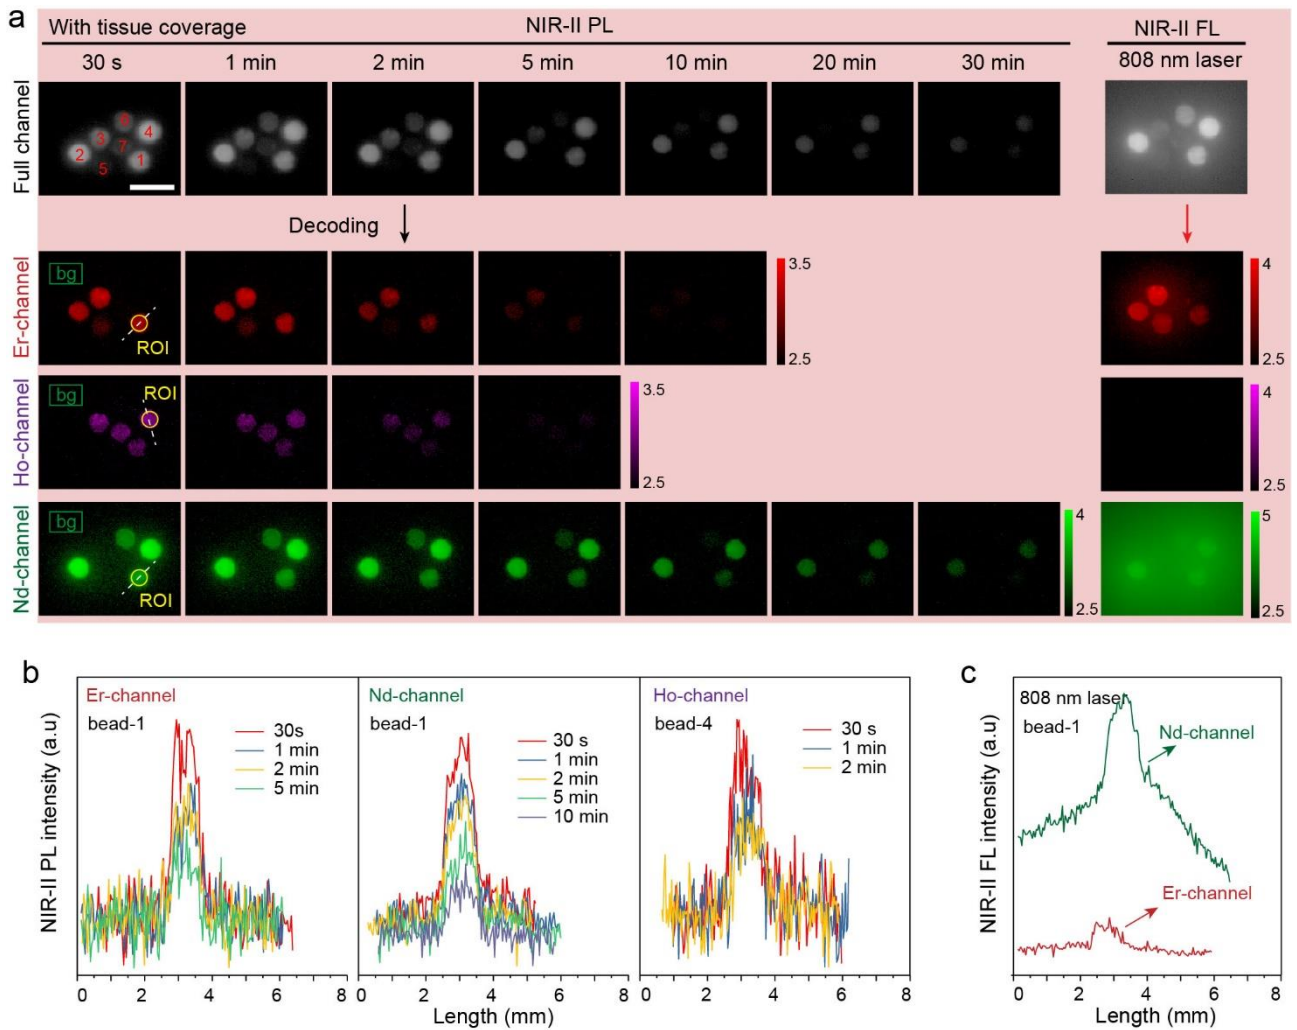

**Figure S15 | Comparison of persistent luminescence and fluorescence signals from encoded PDMS beads in the NIR-II region with 2-mm mimic tissue (1% Intralipid) coverage. a,** NIR-II PL and NIR-II FL images of the encoded PDMS beads in different imaging channels over time. **b,** Line scan profiles of the encoded PDMS beads under NIR-II PL imaging as a function of time in the Er-, Ho-, and Nd-channel. **c,** Line scan profiles of the encoded PDMS beads under NIR-II FL imaging. Signal-to-noise ratio (SNR) =  $ROI \text{ intensity} / bg \text{ intensity}$ . *bg*: background, ROI: region of interest. An 808-nm laser ( $4 \text{ mW/cm}^2$ ) was used to excite the encoded PDMS to generate NIR-II FL imaging.

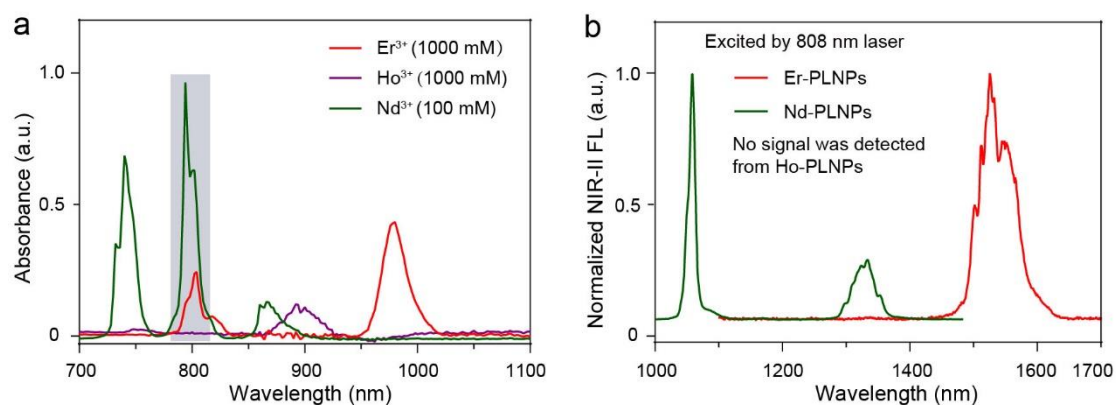

**Figure S16 | Optical properties of Ln-PLNPs.** **a.** Normalized absorption spectra of Er<sup>3+</sup>, Ho<sup>3+</sup> and Nd<sup>3+</sup> in water. **b.** NIR-II FL spectra of Er-PLNPs, Ho-PLNPs and Nd-PLNPs (0.2 mM in cyclohexane), excited by 808 nm laser (2 mW/cm<sup>2</sup>). Only Er-PLNPs and Nd-PLNPs can be excited by 808 nm laser to generate NIR-II emissions at 1525 nm and 1064 nm, respectively, while no NIR-II emission can be found for Ho-PLNPs due to no absorption transitions around 808 nm.

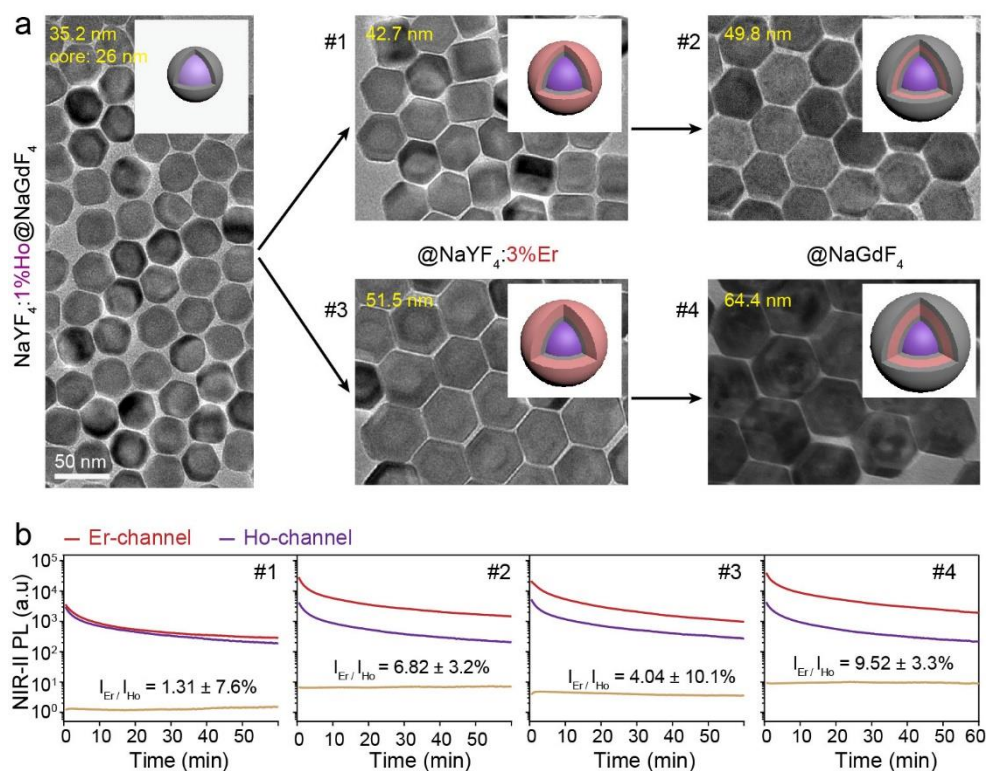

**Figure 17 | Tuning the ratios of the persistent luminescence signals with multilayered Ho/Er-PLNPs. a, b,** TEM images (a) and corresponding PL decay curves (b) of multilayered Ho/Er-PLNPs (NaYF<sub>4</sub>:1%Ho@NaGdF<sub>4</sub>@NaYF<sub>4</sub>:3%Er@NaGdF<sub>4</sub>). The PL ratios ( $I_{Er}/I_{Ho}$ ) can be tuned from 1.31 to 9.52 by precisely modulating the thickness of the NaYF<sub>4</sub>:3%Er shell. All samples (0.2 mM in cyclohexane) were pre-irradiated by X-ray (200 Gy) and then imaged with 5 s exposure time.

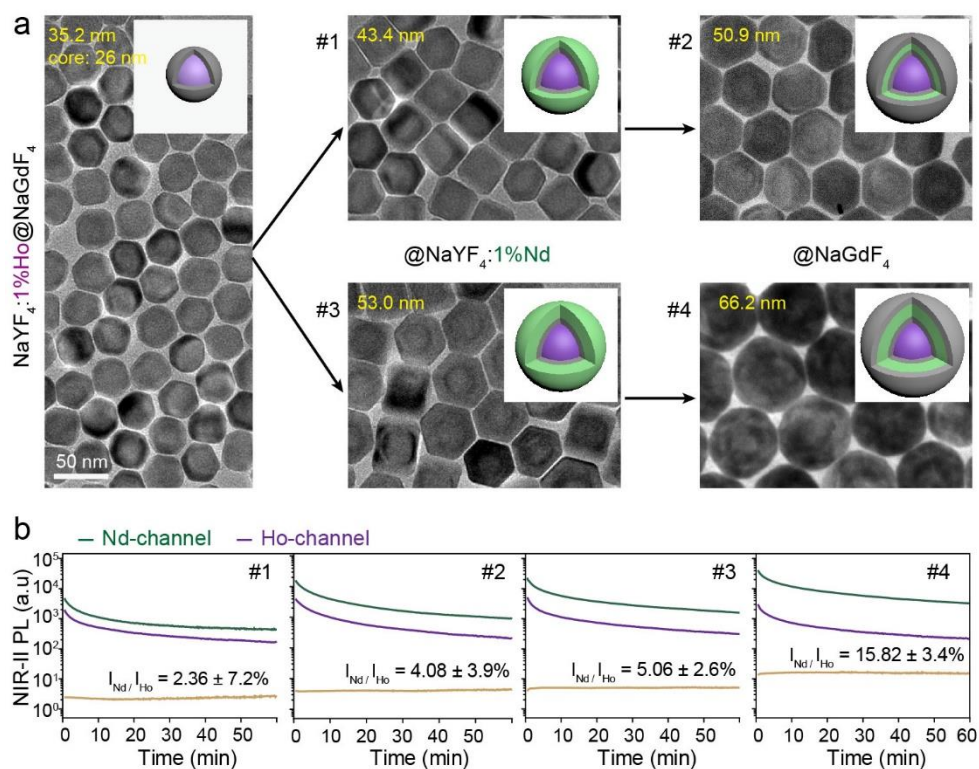

**Figure 18 | Tuning the ratios of the persistent luminescence signals with multilayered Ho/Nd-PLNPs.** **a, b,** TEM images (**a**) and corresponding PL decay curves (**b**) of multilayered Nd/Ho-PLNPs ( $\text{NaYF}_4:1\% \text{Ho} @ \text{NaGdF}_4 @ \text{NaYF}_4:1\% \text{Nd} @ \text{NaGdF}_4$ ). The PL ratios ( $I_{\text{Nd}}/I_{\text{Ho}}$ ) can be tuned from 2.36 to 15.82 by precisely modulating the thickness of  $\text{NaYF}_4:1\% \text{Nd}$  shell. All samples (0.2 mM in cyclohexane) were pre-irradiated by X-ray (200 Gy) and then imaged with 5 s exposure time.

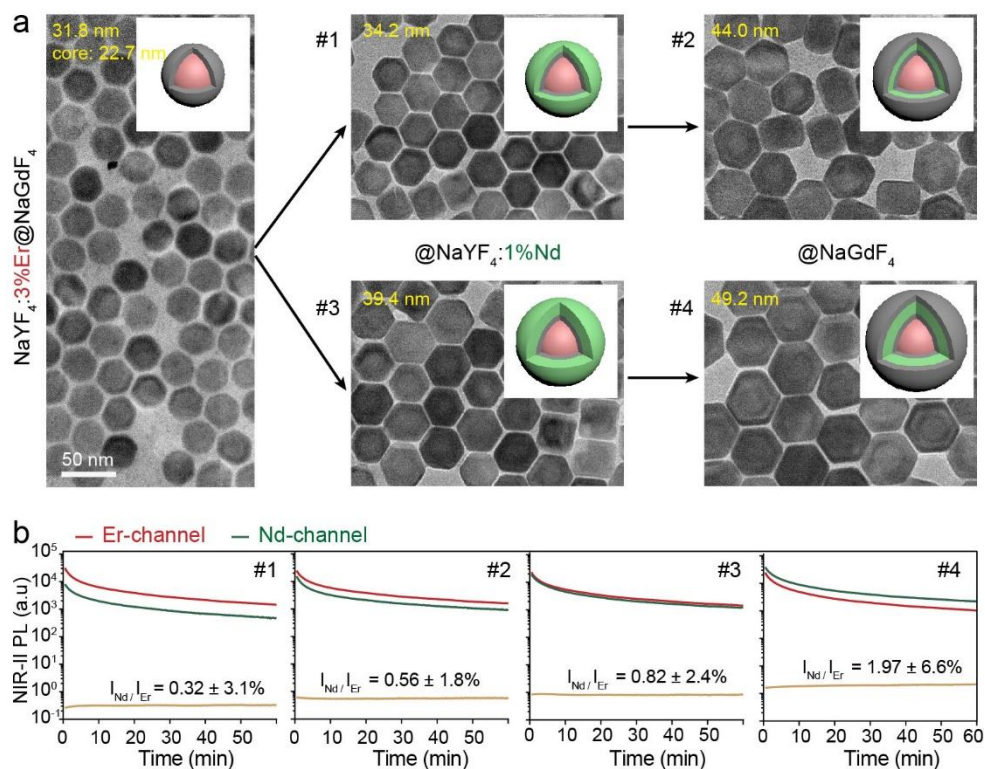

**Figure 19 | Tuning the ratios of the persistent luminescence signals with different multilayered Er/Nd PLNPs.** **a, b,** TEM images (**a**) and corresponding PL decay curves (**b**) of multilayered Er/Nd-PLNPs (NaYF<sub>4</sub>:3%Er@NaGdF<sub>4</sub>@NaYF<sub>4</sub>:1%Nd@NaGdF<sub>4</sub>). The PL ratios ( $I_{Nd}/I_{Er}$ ) can be tuned from 0.32 to 1.97 by precisely modulating the thickness of NaYF<sub>4</sub>:1%Nd shell. All samples (0.2 mM in cyclohexane) were pre-irradiated by X-ray (200 Gy) and then imaged with 5 s exposure time.

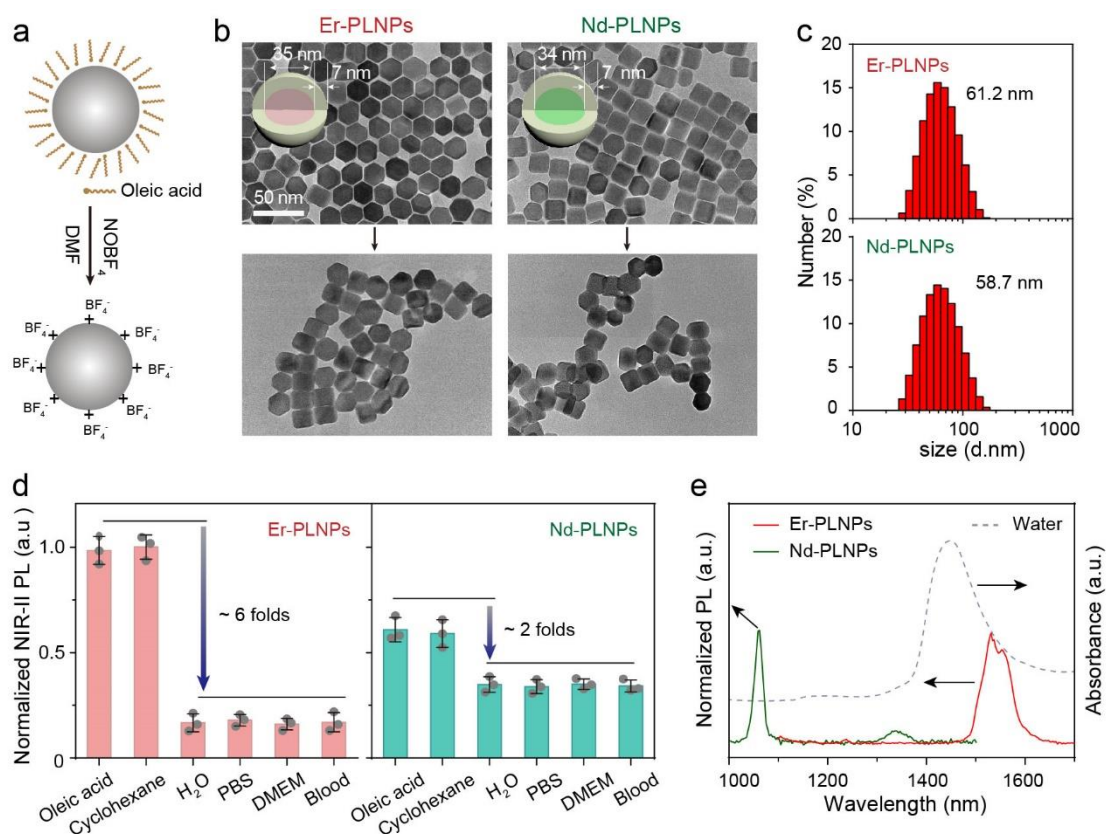

**Figure S20 | Characterization of aqueous Er-PLNPs ( $\text{NaYF}_4:3\%\text{Er}@\text{NaYF}_4$ ) and Nd-PLNPs ( $\text{NaYF}_4:1\%\text{Nd}@\text{NaYF}_4$ ) for in vivo NIR-II imaging.** **a**, Schematic illustration of synthesizing hydrophilic nanoparticles by ligand-exchange strategy for biological applications. Through the ligand-exchange strategy, original oleic acid molecules on the nanoparticles were physically removed and coordinated by inorganic  $\text{BF}_4^-$  to the surface of the nanoparticles. **b**, TEM images of Er-PLNPs and Nd-PLNPs before and after  $\text{NOBF}_4$  treatment. **c**, Hydrodynamic diameters of Er-PLNPs and Nd-PLNPs in water using DLS (dynamic light scattering) measurement. **d**, Comparison of NIR-II PL intensities (normalized to PL intensity of Er-PLNPs in cyclohexane) of Er-PLNPs and Nd-PLNPs in oleic acid, cyclohexane, water,  $1\times$ PBS buffer (pH = 7.4), DMEM medium (10% FBS) and mouse blood ( $n = 3$  independent experiments). **e**, NIR-II PL spectra of Er-PLNPs and Nd-PLNPs, and absorption spectrum of water in the NIR-II region. The absorption spectrum of water was obtained by a cuvette with 1-mm optical path. All samples (0.2 mM in different media) were pre-irradiated with X-rays ( $\sim 200$  Gy) and then imaged with 5 s exposure time. The data are shown as the mean  $\pm$  SD.

Compared to oleic acid, water molecules with the high energy ( $\sim 3500\text{ cm}^{-1}$ ) of the stretching vibration can act as surface oscillators, which can quench the luminescence of the lanthanide nanoparticles when dispersed in aqueous solutions<sup>3</sup>. Besides, water molecules have shown two

vibrational overtone bands shown as local maxima at 1200 nm and 1450 nm in the NIR-II (1000 - 1700 nm) region<sup>4</sup>, which causes higher absorption at 1525 nm (Er-PLNPs,  $^4I_{13/2} \rightarrow ^4I_{15/2}$ ) than that at 1064 nm (Nd-PLNPs,  $^4F_{3/2} \rightarrow ^4I_{11/2}$ ). Therefore, the quenching effect by water for Er-PLNPs was larger than that for Nd-PLNPs in aqueous solutions as shown in **d**.

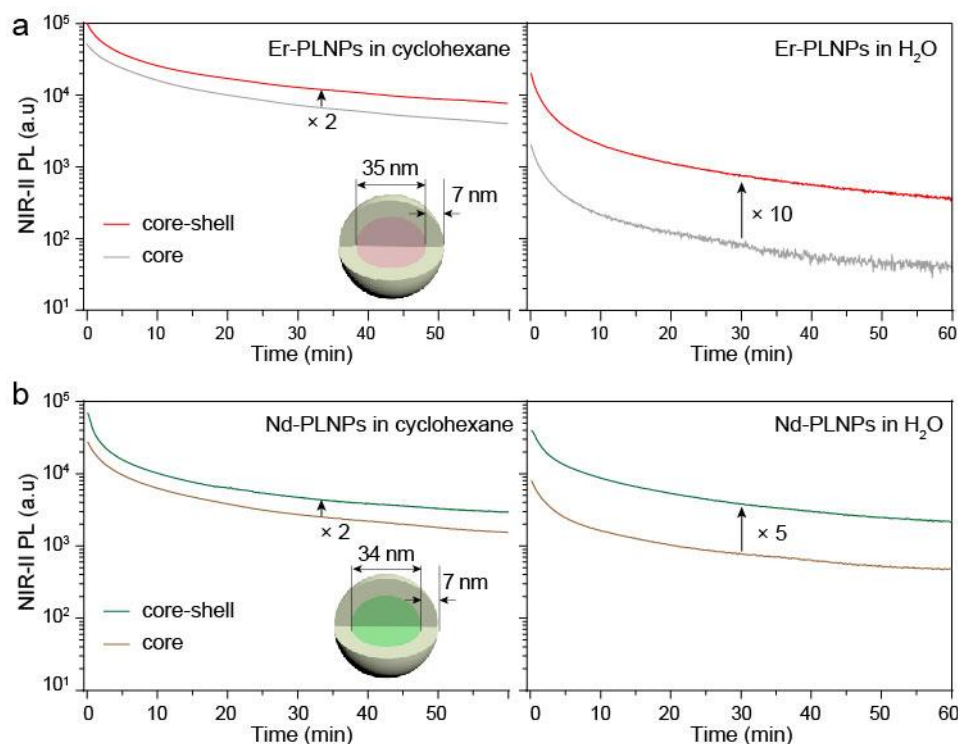

**Figure S21 | Influence of the core-shell structure on NIR-II persistent luminescence in different media.** **a**, NIR-II PL decay curves of Er-PLNPs with bare core ( $\text{NaYF}_4:3\%\text{Er}$ ) and core-shell structure ( $\text{NaYF}_4:3\%\text{Er}@\text{NaYF}_4$ ). **b**, NIR-II PL decay curves of Nd-PLNPs with bare core ( $\text{NaYF}_4:1\%\text{Nd}$ ) and core-shell structure ( $\text{NaYF}_4:1\%\text{Nd}@\text{NaYF}_4$ ). Due to the protection of shell, NIR-II PL intensities of core-shell Er-PLNPs and Nd-PLNPs were 10-fold and 5-fold higher than that of the corresponding core in  $\text{H}_2\text{O}$  over time, respectively, and these values were only 2-fold in cyclohexane. All samples (0.2 mM) were pre-irradiated with X-ray ( $\sim 200$  Gy) and then imaged with 5 s exposure time.

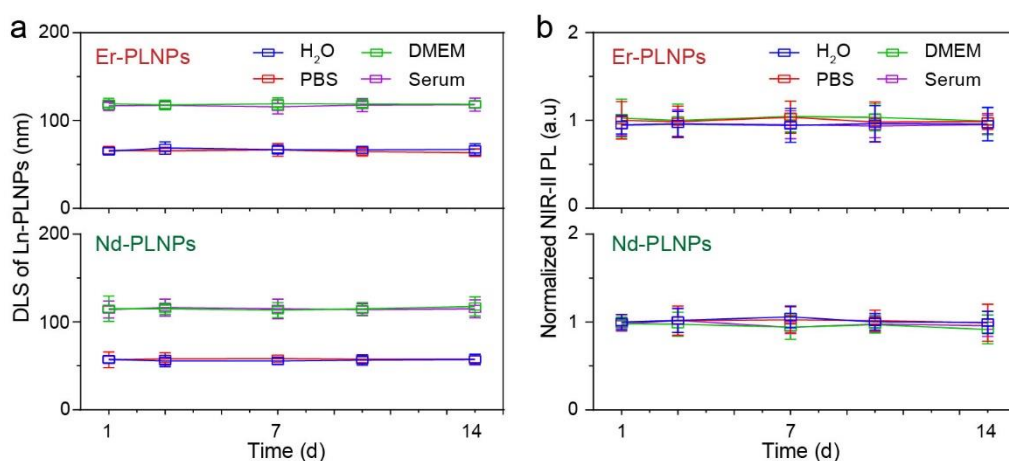

**Figure S22 | Stability of Er-PLNPs ( $\text{NaYF}_4\text{:}3\%\text{Er@NaYF}_4$ ) and Nd-PLNPs ( $\text{NaYF}_4\text{:}1\%\text{Nd@NaYF}_4$ ).** **a,b**, Hydrodynamic size (**a**) and NIR-II PL signals (**b**) of Er-PLNPs and Nd-PLNPs in water, 1×PBS buffer (pH = 7.4), DMEM medium (10% FBS) and mouse serum over time ( $n = 3$  independent experiments). The data are shown as the mean  $\pm$  SD.

For NIR-II PL stability experiments, all samples (0.2 mM in different media) were pre-irradiated with X-rays ( $\sim 200$  Gy) and then imaged with 5 s exposure time. The PL intensities and hydrodynamic size of Er-PLNPs and Nd-PLNPs keep constant over two weeks. Larger sizes of these nanoparticles were observed when dispersed in DMEM and mouse serum ( $\sim 120$  nm) compared to in PBS and water ( $\sim 60$  nm), which could be ascribed to the protein corona coating on the nanoparticles<sup>5</sup>.



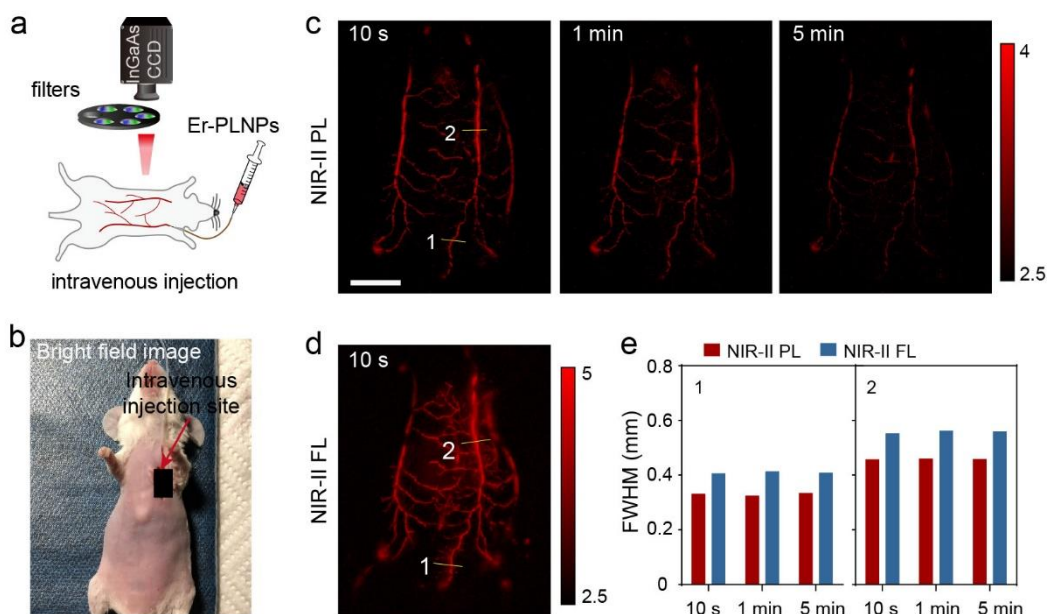

**Figure S23 | *In vivo* NIR-II persistent luminescence and NIR-II fluorescence imaging of blood vessels using Er-PLNPs ( $\text{NaYF}_4:3\%\text{Er}@\text{NaYF}_4$ ).** **a**, Schematic illustration of NIR-II PL imaging of blood vessels. **b**, Bright-field image of a living mouse during intravenous injection of Er-PLNPs via the abdominal vein. **c**, **d**, NIR-II PL imaging (**c**) and NIR-II FL imaging (**d**) of blood vessels on a living mouse over time. **e**, FWHM of of blood vessels in NIR-II PL (**c**) and NIR-II FL images (**d**) as a function of time. Exposure time for PL and FL imaging is 10 s and 0.2 s, respectively. Er-PLNPs (0.2 mM in  $\text{H}_2\text{O}$ ) were pre-irradiated by X-ray ( $\sim 200$  Gy) and then stored at  $-20$  °C prior to imaging. Scale bar: 1cm.

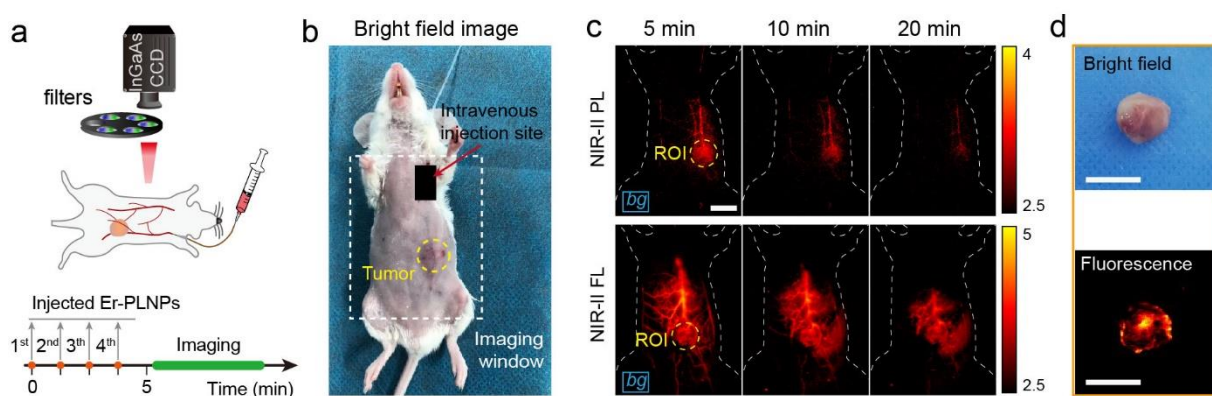

**Figure S24 | *In vivo* NIR-II persistent luminescence and NIR-II fluorescence imaging of tumours using Er-PLNPs (NaYF<sub>4</sub>:3%Er@NaYF<sub>4</sub>).** **a**, Schematic illustration of NIR-II PL imaging of tumours. **b**, Bright-field image of a 4T1 tumour-bearing mouse during intravenous injection of Er-PLNPs via the abdominal vein. **c**, NIR-II PL and NIR-II FL imaging of tumours on living mice after multiple injections of Er-PLNPs over time (0.2 mM in H<sub>2</sub>O, 40 μL × 4 times). Tumour-to-normal tissue (T/N) = ROI intensity / bg intensity. bg: background. **d**, Bright-field image and fluorescence image of the ex vivo tumour. Exposure time for PL and FL imaging is 10 s and 0.2 s, respectively. Er-PLNPs (0.2 mM in H<sub>2</sub>O) were pre-irradiated by X-ray (~200 Gy) and then stored at -20 °C prior to imaging. Scale bar: 1cm.

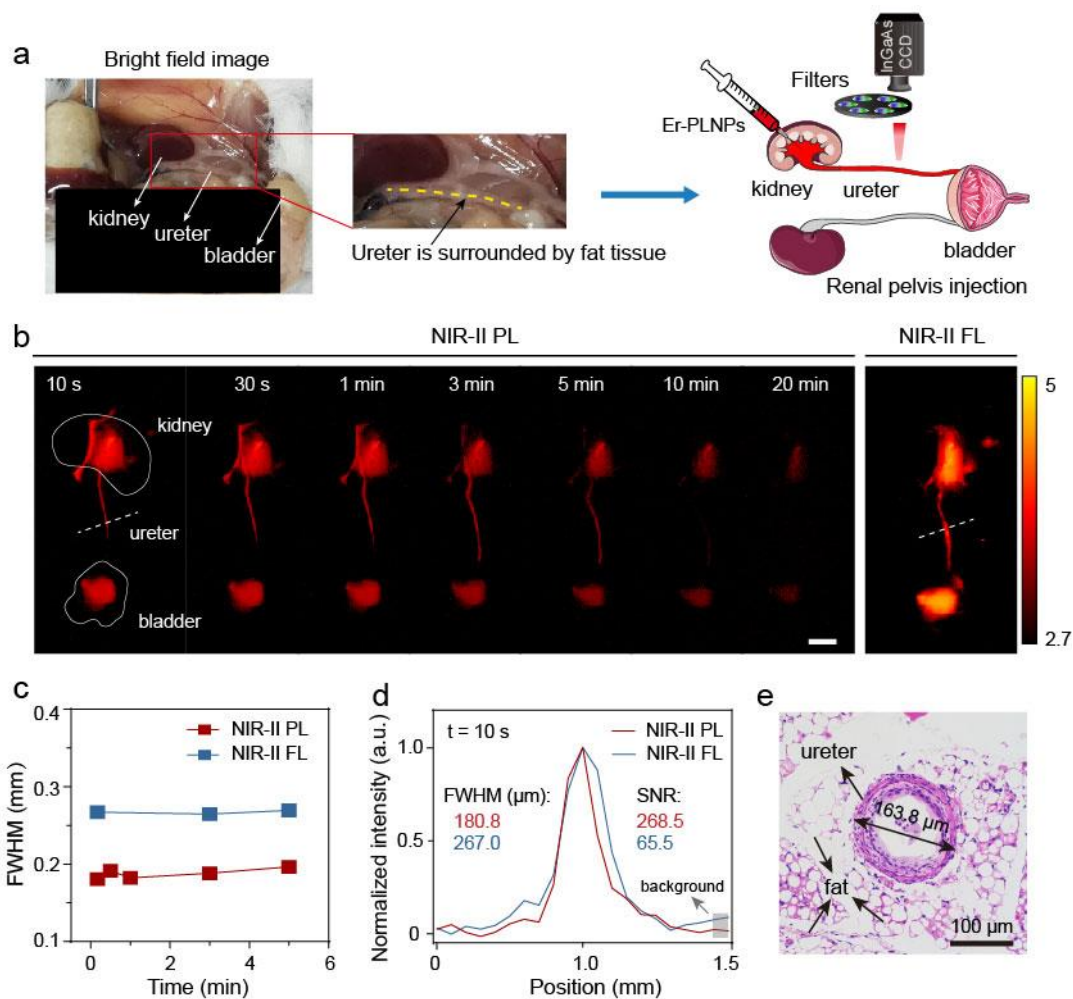

**Figure S25 | *In vivo* NIR-II persistent luminescence and NIR-II fluorescence imaging of ureter using Er-PLNPs (NaYF<sub>4</sub>:3%Er@NaYF<sub>4</sub>).** **a**, Schematic illustration of NIR-II PL imaging and bright-field image of ureters. **b**, The NIR-II PL and NIR-II FL images of ureters on a living mouse after renal pelvis injection of Er-PLNPs over time (0.2 mM in H<sub>2</sub>O, 50 μL). **c**, FWHM of the ureter shown in **b** (dotted line) as a function of time. **d**, Normalized intensity profiles of NIR-II PL and NIR-II FL images of ureter shown in **b** (dotted line). **e**, H&E staining of the ureter shown in **b**, showing that the ureter is thin-walled and surrounded by fat tissue. Exposure time for PL and FL imaging is 10 s and 0.2 s, respectively. Scale bar: 100 μm.

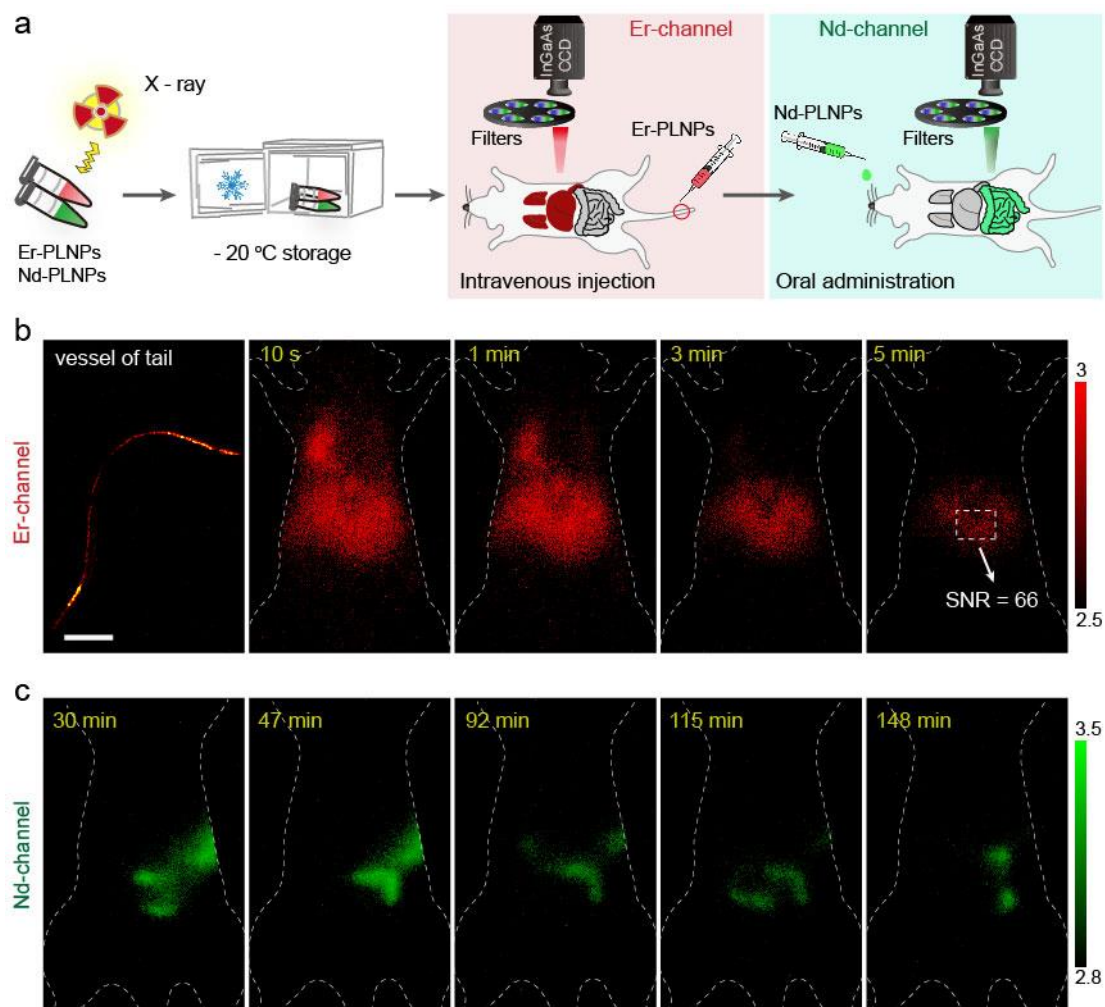

**Figure S26 | Dual-channel *in vivo* NIR-II persistent luminescence imaging of organs and blood vessels in a living mouse.** **a**, Schematic illustration of animal experiment procedures for dual-channel imaging. **b**, **c**, NIR-II PL images of visceral organs (**b**) and intestine (**c**) captured at different time intervals. Er-PLNPs ( $\text{NaYF}_4:3\%\text{Er}@\text{NaYF}_4$ ) and Nd-PLNPs ( $\text{NaYF}_4:1\%\text{Nd}@\text{NaYF}_4$ ) were pre-irradiated with X-rays ( $\sim 200$  Gy) and then stored at  $-20$  °C before animal experiments. All PL images were acquired using a home-made NIR-II imaging system with 10 s exposure time. Scale bar: 1 cm.

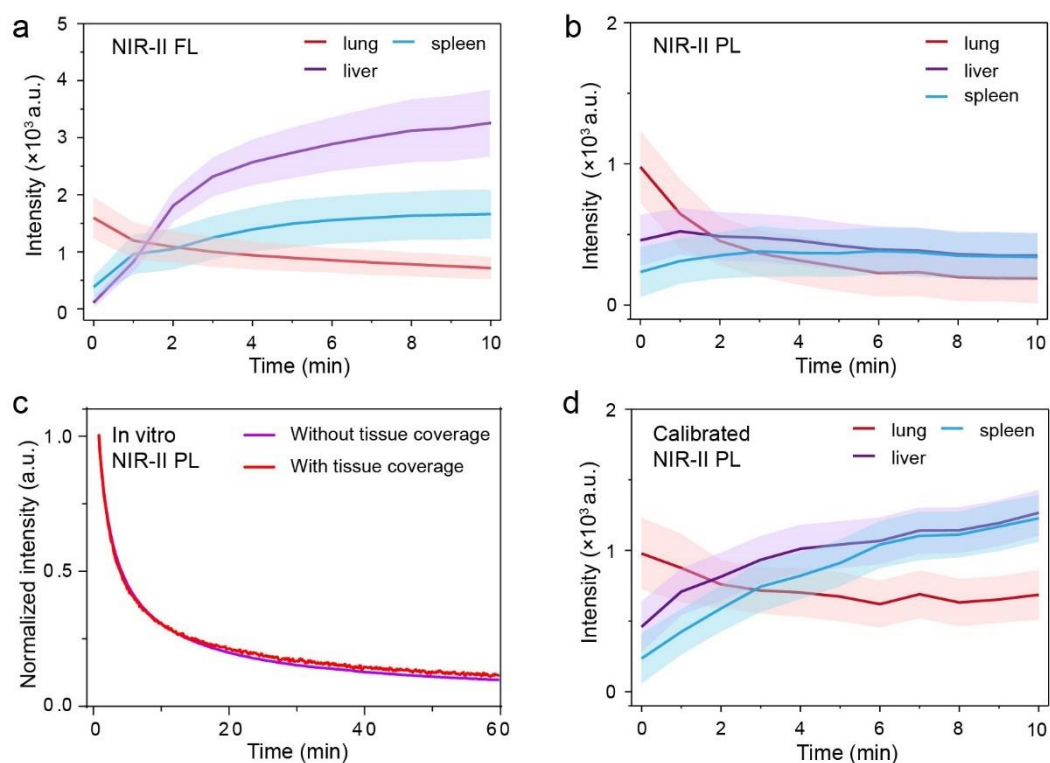

**Figure S27 | Influence of persistent luminescence decay on the decrease of persistent luminescence signal intensity detected *in vivo*.** **a, b,** Time-dependent NIR-II FL (**a**) and NIR-II PL (**b**) intensity of visceral organs after tail vein injection of Er-PLNPs. **c,** Normalized NIR-II PL decay curves of Er-PLNPs with or without 2-mm mimic tissue (1% Intralipid) coverage. **d,** Calibrated NIR-II PL intensity of visceral organs based on the PL decay shown in **c** ( $n$  = the number of pixels within the corresponding ROI for the lung, liver and spleen). Exposure time for PL and FL imaging is 10 s and 0.1 s, respectively. The data are shown as the mean  $\pm$  SD.

For *in vivo* experiments, the decreasing signal intensity of Ln-PLNPs should be ascribed to two reasons: PL decay due to time and dynamic biodistribution of nanoparticles. To analyze the influence of PL decay on the *in vivo* decreasing PL signal intensity, Er-PLNPs were firstly injected to live mice via tail vein. For conventional FL imaging, the changing signal intensity is unambiguously ascribed to the dynamic biodistribution of nanoparticles, thus reflecting the real-time biodistribution of Er-PLNPs (**Fig. S27a**). Compared with FL imaging, though the changing signal intensity for PL imaging was unable to truly reflect biodistribution of Er-PLNPs due to PL decay interference (**Fig. S27b**), the *in vivo* decreasing PL signal resulting from PL decay can be calibrated (**Fig. S27d**) according to its PL decay curves, independent of tissue coverage (**Fig. S27c**).

**Table. S1** | Comparison of persistent luminescent materials with NIR emission.

|                                                                       | Materials                                                                                                                                    | $\lambda_{em}$                     | Life -time | Size                                         | Nanostructure control                        | Application                                                                                                                                | Irradiation source                                                           | Reference                                                                 |
|-----------------------------------------------------------------------|----------------------------------------------------------------------------------------------------------------------------------------------|------------------------------------|------------|----------------------------------------------|----------------------------------------------|--------------------------------------------------------------------------------------------------------------------------------------------|------------------------------------------------------------------------------|---------------------------------------------------------------------------|
| <b>Inorganic nanomaterials</b>                                        | Ln-PLNPs (Ln: Er/Nd/Ho/Tm)                                                                                                                   | 1532 nm, 1475 nm, 1180 nm, 1064 nm | > 72 h     | Highly uniform nanoparticle, adjustable size | Core-shell structure, multilayered structure | Imaging of blood vessels, ureters and tumours, dual-colour imaging of visceral organs, multimodal imaging of tumour, coding in deep tissue | X-ray                                                                        | This work                                                                 |
|                                                                       | ZnGa <sub>2</sub> O <sub>4</sub> :Cr                                                                                                         | 695 nm,                            | 6 h        | Nanoparticle (~30 nm)                        | N.A.                                         | Imaging of hepatocellular carcinoma cells, imaging of tumour-bearing mice                                                                  | X-ray                                                                        | Adv. Mater, <b>2019</b> , 31, 1905087                                     |
|                                                                       | ZnGa <sub>2</sub> O <sub>4</sub> :Cr                                                                                                         | 695nm                              | > 20 h     | Nanoparticle (< 31 nm)                       | N.A.                                         | N.A.                                                                                                                                       | UV lamp at 254 nm                                                            | ACS Nano <b>2020</b> , 14, 12113–12124                                    |
|                                                                       | ZnGa <sub>2</sub> O <sub>4</sub> Cr <sub>0.004</sub>                                                                                         | 695nm                              | 1 h        | Nanoparticle (< 10 nm)                       | N.A.                                         | Imaging after subcutaneous injection under a 1cm pork slab                                                                                 | White LED (5000lm)                                                           | J. Am. Chem. Soc, <b>2015</b> ,137, 5304 - 5307                           |
| <b>Inorganic bulky materials</b>                                      | Gd <sub>3</sub> Al <sub>5-x</sub> Ga <sub>x</sub> O <sub>12</sub> :Ce-Cr-Er                                                                  | 1532 nm (via PLET)                 | > 10 h     | Bulky crystal                                | N.A.                                         | N.A.                                                                                                                                       | 460-nm monochromatic light                                                   | Optical Components and Materials XVI, <b>2019</b> doi:10.1117/12.2 505759 |
|                                                                       | Zn <sub>2</sub> Ga <sub>2</sub> Sn <sub>0.5</sub> O <sub>6</sub> :Yb <sup>3+</sup> -Ni <sup>2+</sup>                                         | 1349 nm                            | ~5 min     | Bulky crystal ground into nanoparticle       | N.A.                                         | Anti-counterfeiting                                                                                                                        | UV lamp at 254 nm                                                            | Crystal Growth & Design. <b>2020</b> , 20:1859-67                         |
|                                                                       | LaAlO <sub>3</sub> :Ho-Cr-Sm & LaGaO <sub>3</sub> :Ho-Cr                                                                                     | 1200 nm (via PLET)                 | Hours      | Bulky crystal                                | N.A.                                         | N.A.                                                                                                                                       | 300-W Xe lamp with a UV mirror module (250-380 nm)                           | J. Mater. Chem. C, <b>2018</b> , 11374 - 11383.                           |
|                                                                       | Zn <sub>3</sub> Ga <sub>2</sub> Ge <sub>2</sub> O <sub>10</sub> :Cr <sup>3+</sup>                                                            | 713 nm                             | 360 h      | Bulky crystal                                | N.A.                                         | Painting                                                                                                                                   | 4-W UV lamp at 365 nm or sunlight                                            | Nat. Mater, <b>2012</b> , 11, 58-63.                                      |
|                                                                       | ZnGa <sub>1.995</sub> Cr <sub>0.005</sub> O <sub>4</sub>                                                                                     | 695 nm                             | 2 h        | Bulky crystal ground into nanoparticle       | N.A.                                         | Biodistribution in tumour-bearing mice, cellular tracking in vivo                                                                          | 6-W UV lamp at 254 nm or orange/red LED (70 W)                               | Nat. Mater, <b>2014</b> , 13, 418-426.                                    |
|                                                                       | Zn <sub>2.94</sub> Ga <sub>1.96</sub> Ge <sub>2</sub> O <sub>10</sub> :Cr <sup>3+</sup> , Pr <sup>3+</sup>                                   | 695 nm                             | > 24 h     | Bulky crystal ground into nanoparticle       | N.A.                                         | Targeted imaging of U87MG tumour-bearing mice                                                                                              | Pre-irradiated by a 6-W UV lamp at 254 nm and a 980-nm laser for stimulation | J. Am. Chem. Soc, <b>2013</b> , 135, 14125 - 14133                        |
|                                                                       | Ca <sub>0.2</sub> Zn <sub>0.9</sub> Mg <sub>0.9</sub> Si <sub>2</sub> O <sub>6</sub> :Eu <sup>2+</sup> , Dy <sup>3+</sup> , Mn <sup>2+</sup> | 690 nm                             | > 24 h     | Bulky crystal ground into nanoparticle       | N.A.                                         | Biodistribution in healthy mice, imaging of 3LL tumour-bearing mice                                                                        | 6-W UV lamp at 254 nm                                                        | Proc. Natl. Acad. Sci. USA, <b>2007</b> , 104, 9266 -9271                 |
|                                                                       | MgSi <sub>2</sub> O <sub>6</sub> :Eu <sup>2+</sup> , Mn <sup>2+</sup> , Pr <sup>3+</sup>                                                     | 685 nm                             | < 1 h      | Bulky crystal ground into nanoparticle       | N.A.                                         | Imaging of healthy mice after intravenous injection                                                                                        | 6-W UV lamp at 254 nm                                                        | J. Am. Chem. Soc, <b>2011</b> , 133, 11810-11815.                         |
| <b>Organic materials</b>                                              | SPN-NCBS; SPN-thiol                                                                                                                          | 780 nm                             | Hours      | Nanoparticle (< 40 nm)                       | N.A                                          | Imaging after s.c.injection; lymph node imaging; tumour imaging; activatable imaging                                                       | 808 nm laser (1 W/cm <sup>2</sup> )                                          | Nat. Biotechnol 2017,35, 1102–1110                                        |
| PLET: persistent luminescence energy transfer      N.A: not available |                                                                                                                                              |                                    |            |                                              |                                              |                                                                                                                                            |                                                                              |                                                                           |

**Table. S2** | Detailed compositions and structure parameters of Ln-PLNPs for PL coding in Fig. 1c-f.

| Experiments                | Ln-PLNPs                                      | Core nm | Shell nm |
|----------------------------|-----------------------------------------------|---------|----------|
| Fig.1c<br>Fig.1d<br>Fig.1e | NaYF <sub>4</sub> :3%Er<br>@NaYF <sub>4</sub> | 78.8    | 7.8      |
|                            | NaYF <sub>4</sub> :1%Nd<br>@NaYF <sub>4</sub> | 85.3    | 4.8      |
|                            | NaYF <sub>4</sub> :1%Ho<br>@NaYF <sub>4</sub> | 83.2    | 8.1      |
|                            | NaYF <sub>4</sub> :1%Tm<br>@NaYF <sub>4</sub> | 99.2    | 5.6      |
| Fig.1f                     | NaYF <sub>4</sub> :3%Er<br>@NaYF <sub>4</sub> | 22.7    | 6.5      |

**Table. S3** | Detailed compositions and structure parameters of Ln-PLNPs for PL coding in Fig. 3e-g.

| Bead     | Ln-PLNPs                                                                                                                                             | Core nm | 1st shell nm | 2nd shell nm | 3rd shell nm | 4th shell nm | 5th shell nm | Er-channel | Nd-channel | Ho-channel |
|----------|------------------------------------------------------------------------------------------------------------------------------------------------------|---------|--------------|--------------|--------------|--------------|--------------|------------|------------|------------|
| <b>1</b> | NaYF <sub>4</sub> :1%Ho<br>@NaGdF <sub>4</sub><br>@NaYF <sub>4</sub> :3%Er<br>@NaGdF <sub>4</sub><br>@NaYF <sub>4</sub> :1%Nd<br>@NaGdF <sub>4</sub> | 20.1    | 4.2          | 5.9          | 4.5          | 4.3          | 3.1          | √          | √          | √          |
| <b>2</b> | NaYF <sub>4</sub> :3%Er<br>@NaGdF <sub>4</sub><br>@NaYF <sub>4</sub> :1%Nd<br>@NaGdF <sub>4</sub>                                                    | 22.7    | 4.6          | 3.8          | 4.9          | ---          | ---          | √          | √          | ×          |
| <b>3</b> | NaYF <sub>4</sub> :1%Ho<br>@NaGdF <sub>4</sub><br>@NaYF <sub>4</sub> :3%Er<br>@NaGdF <sub>4</sub>                                                    | 26.0    | 4.6          | 3.7          | 3.6          | ---          | ---          | √          | ×          | √          |
| <b>4</b> | NaYF <sub>4</sub> :1%Ho<br>@NaGdF <sub>4</sub><br>@NaYF <sub>4</sub> :1%Nd<br>@NaGdF <sub>4</sub>                                                    | 26.0    | 4.6          | 4.1          | 3.8          | ---          | ---          | ×          | √          | √          |
| <b>5</b> | NaYF <sub>4</sub> :3%Er<br>@NaYF <sub>4</sub>                                                                                                        | 22.7    | 6.5          | ---          | ---          | ---          | ---          | √          | ×          | ×          |
| <b>6</b> | NaYF <sub>4</sub> :1%Nd<br>@NaYF <sub>4</sub>                                                                                                        | 23.1    | 5.1          | ---          | ---          | ---          | ---          | ×          | √          | ×          |
| <b>7</b> | NaYF <sub>4</sub> :1%Ho<br>@NaYF <sub>4</sub>                                                                                                        | 20.1    | 6.5          | ---          | ---          | ---          | ---          | ×          | ×          | √          |

**Table. S4** | Detailed compositions and structural parameters of Ln-PLNPs for ratiometric PL codes in Fig.3h-j.

| I (ratio from different channels) | Ln-PLNPs                                                                                                          | Core nm | 1st shell nm | 2nd shell nm | 3rd shell nm |
|-----------------------------------|-------------------------------------------------------------------------------------------------------------------|---------|--------------|--------------|--------------|
| $I_{Nd} / I_{Er}$                 | 0.32 ± 3.1%<br>NaYF <sub>4</sub> :3%Er<br>@NaGdF <sub>4</sub><br>@NaYF <sub>4</sub> :1%Nd                         | 22.7    | 4.6          | 1.2          | ---          |
|                                   | 0.56 ± 1.8%<br>NaYF <sub>4</sub> :3%Er<br>@NaGdF <sub>4</sub><br>@NaYF <sub>4</sub> :1%Nd<br>@NaGdF <sub>4</sub>  | 22.7    | 4.6          | 1.2          | 4.9          |
|                                   | 0.82 ± 2.4%<br>NaYF <sub>4</sub> :3%Er<br>@NaGdF <sub>4</sub><br>@NaYF <sub>4</sub> :1%Nd                         | 22.7    | 4.6          | 3.8          | ---          |
|                                   | 1.97 ± 6.6%<br>NaYF <sub>4</sub> :3%Er<br>@NaGdF <sub>4</sub><br>@NaYF <sub>4</sub> :1%Nd<br>@NaGdF <sub>4</sub>  | 22.7    | 4.6          | 3.8          | 4.9          |
| $I_{Er} / I_{Ho}$                 | 1.31 ± 7.6%<br>NaYF <sub>4</sub> :1%Ho<br>@NaGdF <sub>4</sub><br>@NaYF <sub>4</sub> :3%Er                         | 26.0    | 4.6          | 3.7          | ---          |
|                                   | 6.68 ± 3.2%<br>NaYF <sub>4</sub> :1%Ho<br>@NaGdF <sub>4</sub><br>@NaYF <sub>4</sub> :3%Er<br>@NaGdF <sub>4</sub>  | 26.0    | 4.6          | 3.7          | 3.6          |
|                                   | 4.04 ± 10.1%<br>NaYF <sub>4</sub> :1%Ho<br>@NaGdF <sub>4</sub><br>@NaYF <sub>4</sub> :3%Er                        | 26.0    | 4.6          | 8.1          | ---          |
|                                   | 9.52 ± 3.3%<br>NaYF <sub>4</sub> :1%Ho<br>@NaGdF <sub>4</sub><br>@NaYF <sub>4</sub> :3%Er<br>@NaGdF <sub>4</sub>  | 26.0    | 4.6          | 8.1          | 6.5          |
| $I_{Nd} / I_{Ho}$                 | 2.36 ± 7.2%<br>NaYF <sub>4</sub> :1%Ho<br>@NaGdF <sub>4</sub><br>@NaYF <sub>4</sub> :1%Nd                         | 26.0    | 4.6          | 4.1          | ---          |
|                                   | 4.08 ± 3.9%<br>NaYF <sub>4</sub> :1%Ho<br>@NaGdF <sub>4</sub><br>@NaYF <sub>4</sub> :1%Nd<br>@NaGdF <sub>4</sub>  | 26.0    | 4.6          | 4.1          | 3.8          |
|                                   | 5.06 ± 2.6%<br>NaYF <sub>4</sub> :1%Ho<br>@NaGdF <sub>4</sub><br>@NaYF <sub>4</sub> :1%Nd                         | 26.0    | 4.6          | 8.9          | ---          |
|                                   | 15.82 ± 3.4%<br>NaYF <sub>4</sub> :1%Ho<br>@NaGdF <sub>4</sub><br>@NaYF <sub>4</sub> :1%Nd<br>@NaGdF <sub>4</sub> | 26.0    | 4.6          | 8.9          | 6.6          |



**Table. S5** | Comparison of the T/N ratios in NIR-II imaging of tumour.

|                                                                                            | Materials                                                             | Imaging region                | T/N ratio                   | Injection type          | Targeting type                         | Reference                                       |
|--------------------------------------------------------------------------------------------|-----------------------------------------------------------------------|-------------------------------|-----------------------------|-------------------------|----------------------------------------|-------------------------------------------------|
| Inorganic probe                                                                            | Er-PLNPs<br>(NaYF <sub>4</sub> :3%Er@NaYF <sub>4</sub> )              | > 1500 nm<br>(1400 LP filter) | 40.9 for PL,<br>11.1 for FL | Intravenous injection   | Passive                                | This work                                       |
|                                                                                            | Nd-PLNPs<br>(NaYF <sub>4</sub> :1%Nd@NaYF <sub>4</sub> )              | > 1000 nm<br>(1000 LP filter) | 437.6 for PL<br>6.7 for FL  | Intratumoural injection |                                        |                                                 |
|                                                                                            | ErNPs<br>(NaYbF <sub>4</sub> :2%Er,<br>2%Ce,10%Zn@NaYF <sub>4</sub> ) | > 1500 nm<br>(1400 LP filter) | 42.2 for FL                 | Intravenous injection   | Active<br>(anti-PD-L1 mAb)             | Nat Biotechnol.<br><b>2019</b> , 37, 1322–1331. |
|                                                                                            |                                                                       |                               | 11.0 for FL                 |                         | Passive                                |                                                 |
|                                                                                            | CSQDs<br>(PbS/CdS)                                                    | > 1500 nm<br>(1500 LP filter) | 32.6 for FL                 | Intravenous injection   | Passive                                | PNAS. <b>2018</b> , 115, 6590–6595              |
| NaYF <sub>4</sub> :5%Nd@NaGdF <sub>4</sub>                                                 | > 1000 nm<br>(1000 LP filter)                                         | 8.5 for FL                    | Intravenous injection       | Passive                 | Biomaterials. <b>2018</b> , 175, 30-43 |                                                 |
| Organic probe                                                                              | CH1055                                                                | > 1200 nm<br>(1200 LP filter) | 15 for FL                   | Intravenous injection   | Active<br>(anti-EGFR affibody)         | Nat Mater. <b>2016</b> 15, 235–242.             |
|                                                                                            |                                                                       | > 1300 nm<br>(1300 LP filter) | 5.5 for FL                  |                         | Passive                                |                                                 |
|                                                                                            | IR-BGP6                                                               | > 1200 nm<br>(1200 LP filter) | 9.5 for FL                  | Intravenous injection   | Active<br>(anti-PD-L1 mAb)             | Adv. Funct. Mater. <b>2018</b> , 28, 1804956    |
|                                                                                            | ICG                                                                   | > 1000 nm<br>(1000 LP filter) | 5.3 for FL                  | Intravenous injection   | Passive                                | Nat Biomed Eng. <b>2020</b> , 4, 259–271.       |
| PL: persistent luminescence      FL: fluorescence with excitation light      LP: long-pass |                                                                       |                               |                             |                         |                                        |                                                 |

## Reference

- 1 W.J. Schipper, G. B. On the recombination mechanism in X-ray storage phosphors based on lanthanum fluoride. *J. Lumin.* **59**, 377–383 (1994).
- 2 L. H. Brixner, M. K. C., G. Hyatt, W. T. Carnall, G. Blasse. Structure and Luminescence of the La<sub>1-x</sub>Gd<sub>x</sub>F<sub>3</sub> System. *J. Electrochem. Soc.* **138**, 313-317 (1991).
- 3 Wang, F., Wang, J. & Liu, X. Direct evidence of a surface quenching effect on size-dependent luminescence of upconversion nanoparticles. *Angew. Chem. Int. Ed* **49**, 7456–7460, (2010).
- 4 Hong, G., Antaris, A. L. & Dai, H. Near-infrared fluorophores for biomedical imaging. *Nat. Biomed. Eng.* **1**, 0010 (2017).
- 5 Stefan Tenzer, D. D., Joërg Kuharev, Anna Musyanovych, Verena Fetz., Rouven Hecht, F. S., Dagmar Fischer, Klytaimnistra Kiouptsi, Christoph Reinhardt, & Katharina Landfester, H. r. S., Michael Maskos, Shirley K. Knauer and Roland H. Stauber. Rapid formation of plasma protein corona critically affects nanoparticle pathophysiology. *Nat. Biotechnol.* **8**, 772–781 (2013).
